# Supplementary material for: Mechanism of water oxidation by [Ru(bda)(L)2]: the return of the “blue dimer”
Source: Royal Society of Chemistry journal article supplement (doi:10.1039/c4cc07968j), 2015-01-01
Supplement: c4cc07968j1.pdf [file c4cc07968j1.pdf]

## Electronic Supplementary Information

### Mechanism of water oxidation by $[\text{Ru}(\text{bda})(\text{L})_2]$ : the return of the “blue dimer”.

Javier J. Concepcion,<sup>\*,†</sup> Diane K. Zhong,<sup>†</sup> David J. Szalda,<sup>‡</sup> James T. Muckerman,<sup>†</sup>  
Etsuko Fujita<sup>†</sup>

<sup>†</sup> Department of Chemistry, Brookhaven National Laboratory. <sup>‡</sup> Department of Natural Sciences, Baruch College, CUNY, New York, New York 10010

### Index

|                          |                                                                                                                                                                                                                                                                                                                                                                                                                                                                                                                                                                                                                                                                                                                                                                                                  |     |
|--------------------------|--------------------------------------------------------------------------------------------------------------------------------------------------------------------------------------------------------------------------------------------------------------------------------------------------------------------------------------------------------------------------------------------------------------------------------------------------------------------------------------------------------------------------------------------------------------------------------------------------------------------------------------------------------------------------------------------------------------------------------------------------------------------------------------------------|-----|
| Experimental             |                                                                                                                                                                                                                                                                                                                                                                                                                                                                                                                                                                                                                                                                                                                                                                                                  | S3  |
| Figure S1                | $^1\text{H}$ NMR for $[\text{Ru}(\text{bda})(\text{pic})_2]$ in $\text{CDCl}_3$ .                                                                                                                                                                                                                                                                                                                                                                                                                                                                                                                                                                                                                                                                                                                | S3  |
| Figure S2                | $^1\text{H}$ NMR for $[\text{Ru}(\text{bda})(\text{isq})_2]$ in $\text{CDCl}_3$                                                                                                                                                                                                                                                                                                                                                                                                                                                                                                                                                                                                                                                                                                                  | S4  |
| Figure S3                | Synthetic scheme for the synthesis of $\text{P}_2\text{-py}$                                                                                                                                                                                                                                                                                                                                                                                                                                                                                                                                                                                                                                                                                                                                     | S5  |
| Figure S4                | $^1\text{H}$ NMR for 4-(1',2'-dibromoethyl)pyridinium triflate in $\text{DMSO-d}_6$                                                                                                                                                                                                                                                                                                                                                                                                                                                                                                                                                                                                                                                                                                              | S5  |
| Figure S5                | $^1\text{H}$ NMR for 4-(1'-bromoethenyl)pyridine in $\text{CDCl}_3$                                                                                                                                                                                                                                                                                                                                                                                                                                                                                                                                                                                                                                                                                                                              | S6  |
| Figure S6                | $^1\text{H}$ NMR and $^{31}\text{P}$ NMR for tetraethyl(1-(pyridin-4-yl)ethane-1',2'-diyl)bis(phosphonate) in $\text{CDCl}_3$                                                                                                                                                                                                                                                                                                                                                                                                                                                                                                                                                                                                                                                                    | S7  |
| Theoretical calculations |                                                                                                                                                                                                                                                                                                                                                                                                                                                                                                                                                                                                                                                                                                                                                                                                  | S7  |
| Table S1                 | Selected bond distances ( $\text{\AA}$ ) for $[\text{Ru}^{\text{II}}(\text{bda})(\text{pic})_2]$ and $[\text{Ru}^{\text{III}}(\text{bda})(\text{pic})_2]^+$                                                                                                                                                                                                                                                                                                                                                                                                                                                                                                                                                                                                                                      | S8  |
| Figure S7                | Optimized structures of $[\text{Ru}^{\text{III}}(\kappa^4\text{-bda})(\text{pic})_2]^+$ and $[\text{Ru}^{\text{III}}(\kappa^3\text{-bda})(\text{pic})_2(\text{OH}_2)]^+$                                                                                                                                                                                                                                                                                                                                                                                                                                                                                                                                                                                                                         | S8  |
| Figure S8                | X-ray structure of $[\text{Ru}^{\text{III}}(\text{bda})(\text{pic})_2]^+$ in the salt $[\text{Ru}(\text{bda})(\text{pic})_2](\text{ClO}_4)$                                                                                                                                                                                                                                                                                                                                                                                                                                                                                                                                                                                                                                                      | S8  |
| Figure S9                | X-ray structure of $[\text{Ru}^{\text{III}}(\text{bda})(\text{isq})_2]^+$ in the salt $[\text{Ru}(\text{bda})(\text{isq})_2](\text{ClO}_4)$                                                                                                                                                                                                                                                                                                                                                                                                                                                                                                                                                                                                                                                      | S9  |
| Figure S10               | Cyclic voltammograms for 1.0 mM $[\text{Ru}(\text{bda})(\text{pic})_2]$ (black trace) in solution with a glassy carbon electrode and $[\text{Ru}(\text{bda})(\text{P}_2\text{-py})_2]$ (blue trace) on an FTO electrode in 0.1 M pH 8.0 phosphate buffer.                                                                                                                                                                                                                                                                                                                                                                                                                                                                                                                                        | S9  |
| Figure S11               | Representatives CVs at various pHs and $E_{1/2}$ vs pH plot for $[\text{Ru}(\text{bda})(\text{pic})_2]$                                                                                                                                                                                                                                                                                                                                                                                                                                                                                                                                                                                                                                                                                          | S10 |
| Figure S12               | Representatives CVs at various pHs and $E_{1/2}$ vs pH plot for $[\text{Ru}(\text{bda})(\text{P}_2\text{-py})_2]$                                                                                                                                                                                                                                                                                                                                                                                                                                                                                                                                                                                                                                                                                | S10 |
| Figure S13               | Spectral changes associated with oxidation of $\text{Ru}^{\text{II}}$ to $\text{Ru}^{\text{III}}$ in Figure 3                                                                                                                                                                                                                                                                                                                                                                                                                                                                                                                                                                                                                                                                                    | S10 |
| Figure S14               | Spectral changes associated with oxidation of $\text{Ru}^{\text{III}}$ to “ $\text{Ru}^{\text{IV}}$ ” in Figure 3                                                                                                                                                                                                                                                                                                                                                                                                                                                                                                                                                                                                                                                                                | S11 |
| Figure S15               | (A) Predicted absorption spectra using TD-DFT for $[\text{Ru}^{\text{III}}(\kappa^3\text{-bda})(\text{pic})_2(\text{OH}_2)]^+$ ( $\text{Ru}^{\text{III}}\text{-OH}_2$ ), $[\text{Ru}^{\text{IV}}(\text{bda})(\text{pic})_2(\text{OH})]^+$ ( $\text{Ru}^{\text{IV}}\text{-OH}$ ), $[(\kappa^3\text{-bda})(\text{pic})_2\text{Ru}^{\text{III}}\text{ORu}^{\text{III}}(\kappa^3\text{-bda})(\text{pic})_2]$ ( $\text{Ru}^{\text{III}}\text{-O-Ru}^{\text{III}}$ ) and $[(\kappa^3\text{-bda})(\text{pic})_2\text{Ru}^{\text{IV}}\text{ORu}^{\text{IV}}(\kappa^3\text{-bda})(\text{pic})_2]$ ( $\text{Ru}^{\text{IV}}\text{-O-Ru}^{\text{IV}}$ ). (B) Optimized structure of $[(\kappa^3\text{-bda})(\text{pic})_2\text{Ru}^{\text{III}}\text{ORu}^{\text{III}}(\kappa^3\text{-bda})(\text{pic})_2]$ | S11 |

|                                        |                                                                                                                                                                                                                                                                                                                                                                                                                                                                                                                                                                                                                                                                                                                                                                                                                                                                                                                                                                                                                                                                                                                                                                                                                                                                                                                    |     |
|----------------------------------------|--------------------------------------------------------------------------------------------------------------------------------------------------------------------------------------------------------------------------------------------------------------------------------------------------------------------------------------------------------------------------------------------------------------------------------------------------------------------------------------------------------------------------------------------------------------------------------------------------------------------------------------------------------------------------------------------------------------------------------------------------------------------------------------------------------------------------------------------------------------------------------------------------------------------------------------------------------------------------------------------------------------------------------------------------------------------------------------------------------------------------------------------------------------------------------------------------------------------------------------------------------------------------------------------------------------------|-----|
|                                        | (Ru <sup>III</sup> –O–Ru <sup>III</sup> )                                                                                                                                                                                                                                                                                                                                                                                                                                                                                                                                                                                                                                                                                                                                                                                                                                                                                                                                                                                                                                                                                                                                                                                                                                                                          |     |
| Figure S16                             | Spectral changes associated with the last oxidation process in Figure 3                                                                                                                                                                                                                                                                                                                                                                                                                                                                                                                                                                                                                                                                                                                                                                                                                                                                                                                                                                                                                                                                                                                                                                                                                                            | S11 |
| Figure S17                             | Spectral changes associated with the reduction process from 172 to 216 s in Figure 3                                                                                                                                                                                                                                                                                                                                                                                                                                                                                                                                                                                                                                                                                                                                                                                                                                                                                                                                                                                                                                                                                                                                                                                                                               | S12 |
| Figure S18                             | Spectral changes associated with the reduction process from 217 to 280 s in Figure 3                                                                                                                                                                                                                                                                                                                                                                                                                                                                                                                                                                                                                                                                                                                                                                                                                                                                                                                                                                                                                                                                                                                                                                                                                               | S12 |
| Figure S19                             | Absorption spectra for “Ru <sup>IV</sup> ORu <sup>IV</sup> ” at pH 1.0.                                                                                                                                                                                                                                                                                                                                                                                                                                                                                                                                                                                                                                                                                                                                                                                                                                                                                                                                                                                                                                                                                                                                                                                                                                            | S12 |
| Figure S20                             | Absorption spectra for “Ru <sup>III</sup> ORu <sup>III</sup> ” at pH 1.0. Blue: electrochemically generated “Ru <sup>III</sup> ORu <sup>III</sup> ” from [Ru(bda)(pic) <sub>2</sub> ] by controlled-potential electrolysis at 1.2 V followed by reduction of the generated intermediate at 0.97 V. Black: [(L) <sub>2</sub> (H <sub>2</sub> O)Ru <sup>III</sup> ORu <sup>III</sup> (OH <sub>2</sub> )(L) <sub>2</sub> ] <sup>4+</sup> (L is 2,2'-bipyridine-4,4'-dicarboxylic acid) according to Graetzel <i>et al.</i> , <i>J. Mol. Catal.</i> <b>1989</b> , 52, 63.                                                                                                                                                                                                                                                                                                                                                                                                                                                                                                                                                                                                                                                                                                                                              | S13 |
| Figure S21                             | (A) Rotating ring disc voltammogram in 0.1 M HClO <sub>4</sub> . The potential at the disc was scanned from 1.2 V to 1.7 V at 10 mV/s. The rotation rate was 500 rpm. The potential of the ring (platinum) was held constant at -0.017 V. Black: current with [Ru(bda)(P <sub>2</sub> -py) <sub>2</sub> ] attached to <i>nano</i> -ITO-modified glassy carbon disc. Red: corresponding ring current with [Ru(bda)(P <sub>2</sub> -py) <sub>2</sub> ] present on the modified disc electrode. The increase in cathodic current at the ring past 1.33 V indicates oxygen generation at the disc. (B) Rotating ring disc voltammogram in 0.1 M HClO <sub>4</sub> . The potential at the disc was scanned from 1.2 V to 1.8 V at 10 mV/s. The rotation rate was 500 rpm. The potential of the ring (platinum) was held constant at +1.13 V where oxidation of H <sub>2</sub> O <sub>2</sub> to O <sub>2</sub> at platinum is diffusion-limited. Black: current with [Ru(bda)(P <sub>2</sub> -py) <sub>2</sub> ] attached to <i>nano</i> -ITO-modified glassy carbon disc. Red: corresponding ring current with [Ru(bda)(P <sub>2</sub> -py) <sub>2</sub> ] present on the modified disc electrode. The absence of anodic current at the ring indicates that no H <sub>2</sub> O <sub>2</sub> is generated at the disc. | S13 |
| Collection and Reduction of X-Ray Data |                                                                                                                                                                                                                                                                                                                                                                                                                                                                                                                                                                                                                                                                                                                                                                                                                                                                                                                                                                                                                                                                                                                                                                                                                                                                                                                    | S13 |
| Table S2                               | Crystallographic Collection and Refinement Data for [Ru(bda)(pic) <sub>2</sub> ](ClO <sub>4</sub> ) and [Ru(bda)(isq) <sub>2</sub> ](ClO <sub>4</sub> )                                                                                                                                                                                                                                                                                                                                                                                                                                                                                                                                                                                                                                                                                                                                                                                                                                                                                                                                                                                                                                                                                                                                                            | S14 |
| Table S3                               | Comparison of bond lengths [Å] and angles [deg] between [Ru(bda)(pic) <sub>2</sub> ](ClO <sub>4</sub> ) and [Ru(bda)(isq) <sub>2</sub> ](ClO <sub>4</sub> )                                                                                                                                                                                                                                                                                                                                                                                                                                                                                                                                                                                                                                                                                                                                                                                                                                                                                                                                                                                                                                                                                                                                                        | S15 |
| Figure S22                             | A view of [Ru(bda)(pic) <sub>2</sub> ](ClO <sub>4</sub> )                                                                                                                                                                                                                                                                                                                                                                                                                                                                                                                                                                                                                                                                                                                                                                                                                                                                                                                                                                                                                                                                                                                                                                                                                                                          | S16 |
| Figure S23                             | A view of [Ru(bda)(isq) <sub>2</sub> ](ClO <sub>4</sub> )                                                                                                                                                                                                                                                                                                                                                                                                                                                                                                                                                                                                                                                                                                                                                                                                                                                                                                                                                                                                                                                                                                                                                                                                                                                          | S16 |
| Figure S24                             | Close contacts for [Ru(bda)(isq) <sub>2</sub> ](ClO <sub>4</sub> )                                                                                                                                                                                                                                                                                                                                                                                                                                                                                                                                                                                                                                                                                                                                                                                                                                                                                                                                                                                                                                                                                                                                                                                                                                                 | S17 |
| Figure S25                             | Close contacts for [Ru(bda)(pic) <sub>2</sub> ](ClO <sub>4</sub> )                                                                                                                                                                                                                                                                                                                                                                                                                                                                                                                                                                                                                                                                                                                                                                                                                                                                                                                                                                                                                                                                                                                                                                                                                                                 | S17 |
| Table S4                               | Cartesian coordinates for [(κ <sup>3</sup> -bda)(pic) <sub>2</sub> Ru <sup>III</sup> ORu <sup>III</sup> (κ <sup>3</sup> -bda)(pic) <sub>2</sub> ](Ru <sup>III</sup> –O–Ru <sup>III</sup> )                                                                                                                                                                                                                                                                                                                                                                                                                                                                                                                                                                                                                                                                                                                                                                                                                                                                                                                                                                                                                                                                                                                         | S17 |
| Table S5                               | Cartesian coordinates for [Ru <sup>III</sup> (κ <sup>3</sup> -bda)(pic) <sub>2</sub> (OH <sub>2</sub> )] <sup>+</sup> (Ru <sup>III</sup> –OH <sub>2</sub> )                                                                                                                                                                                                                                                                                                                                                                                                                                                                                                                                                                                                                                                                                                                                                                                                                                                                                                                                                                                                                                                                                                                                                        | S20 |
| Table S6                               | Cartesian coordinates for [Ru <sup>IV</sup> (bda)(pic) <sub>2</sub> (OH)] <sup>+</sup> (Ru <sup>IV</sup> –OH)                                                                                                                                                                                                                                                                                                                                                                                                                                                                                                                                                                                                                                                                                                                                                                                                                                                                                                                                                                                                                                                                                                                                                                                                      | S21 |
| Table S7                               | Cartesian coordinates for [(κ <sup>3</sup> -bda)(pic) <sub>2</sub> Ru <sup>IV</sup> ORu <sup>IV</sup> (κ <sup>3</sup> -bda)(pic) <sub>2</sub> ](Ru <sup>IV</sup> –O–Ru <sup>IV</sup> )                                                                                                                                                                                                                                                                                                                                                                                                                                                                                                                                                                                                                                                                                                                                                                                                                                                                                                                                                                                                                                                                                                                             | S22 |
| References                             |                                                                                                                                                                                                                                                                                                                                                                                                                                                                                                                                                                                                                                                                                                                                                                                                                                                                                                                                                                                                                                                                                                                                                                                                                                                                                                                    | S24 |

## Experimental.

**Materials.** High-purity water was obtained by passing house-distilled water through a Millipore Milli-Q Synthesis A-10 system. Perchloric acid (70%, Aldrich, 99.999% trace metals grade) was used to prepare 0.1 M HClO<sub>4</sub>. Di-μ-chlorobis-[(η<sup>6</sup>-benzene)chlororuthenium(II)] [(Ru(benzene)Cl)<sub>2</sub>Cl<sub>2</sub>]<sup>1</sup> and 2,2'-bipyridine-6,6'-dicarboxylic acid (bdaH<sub>2</sub>)<sup>2</sup> were synthesized as reported in the literature.

## Instrumentation.

NMR spectra were recorded at room temperature on a Bruker Avance spectrometer operating at 400 MHz. Chemical shifts are reported in parts per million (ppm) referenced to the residual solvent peak. Reported pH values were measured on a Fisher Scientific \*accumet\* Micro glass electrode after calibration with standard buffer solutions. Electronic absorption spectra were recorded with a UV-visible Agilent 8453 diode-array spectrophotometer and were corrected for the background spectrum of the solvent. Elemental analyses were performed by Robertson Microlit Laboratories. Electrochemical measurements were made with a CH Instruments CH-760E potentiostat at room temperature (22 ± 1 °C). Voltammetric studies were performed in a single compartment cell on glassy carbon disc (GC) or fluorine doped tin oxide (FTO) planar working electrodes with a Ag/AgCl (3 M NaCl) reference electrode and platinum wire counter electrode. An electrolyte filled bridge tube fitted with a Vycor tip (Bioanalytical Systems Inc., MF-2042) was employed when exclusion of chloride ion was desired. Electrochemical preparations of Ru(III) catalyst samples were performed in a bulk electrolysis cell (Bioanalytical Systems Inc., MF-1056) on a large surface area reticulated vitreous carbon (RVC) electrode. Rotating ring-disc electrode (RRDE) experiments were performed with a Pine Instruments bipotentiostat and rotator. The working electrode was the previously described *nano*-ITO or *nano*-ATO modified ring-disc electrode (*nano*-ITO-RRDE). The reference electrode was a standard Ag/AgCl electrode (PINE model RREF0021) mounted in a Vycor tipped glass tube with fresh electrolyte to avoid chloride contamination of the primary electrolyte. The counter electrode was a platinum wire coil in an isolated glass tube with fine glass frit separator (PINE model AFCTR5). All the experiments were performed with 0.1 M HClO<sub>4</sub> following literature procedures.<sup>3</sup>

## Methods.

### Synthesis and characterization.

**[Ru(bda)(pic)<sub>2</sub>]<sub>2</sub>•H<sub>2</sub>O.** [(Ru(benzene)Cl)<sub>2</sub>Cl<sub>2</sub>], 307 mg (0.614 mmol), bdaH<sub>2</sub>, 300 mg (1.23 mmol) and methanol (30 mL) were added to a three-neck round bottom flask. The mixture was degassed with argon and refluxed for 2 hours. 4-picoline (1.0 mL) was added followed by triethylamine (1.5 mL) and refluxed was continued overnight. The reaction mixture was allowed to cool to room temperature and filtered to separate an orange solid, presumably *trans*-[Ru(pic)<sub>4</sub>Cl<sub>2</sub>] based on <sup>1</sup>H NMR. The filtrate was taken to dryness by rotary evaporation and acetone was added. The solid was collected by filtration and washed with acetone until the washings were clear. The solid was dissolved in chloroform and washed with aqueous ascorbic acid (two times) and with water. The organic phase was dried with

magnesium sulfate, filtered and taken to dryness by rotary evaporation. The solid was collected to yield 521 mg, 80% of  $[\text{Ru}(\text{bda})(\text{pic})_2]$ . Elemental analysis calculated for  $[\text{Ru}(\text{bda})(\text{pic})_2] \cdot \text{H}_2\text{O}$ ,  $\text{C}_{24}\text{H}_{22}\text{N}_4\text{O}_5\text{Ru}$  (MW 547.53): C 52.65; H 4.05; N 10.23; Found: C 52.10, H 3.81, N 10.21.

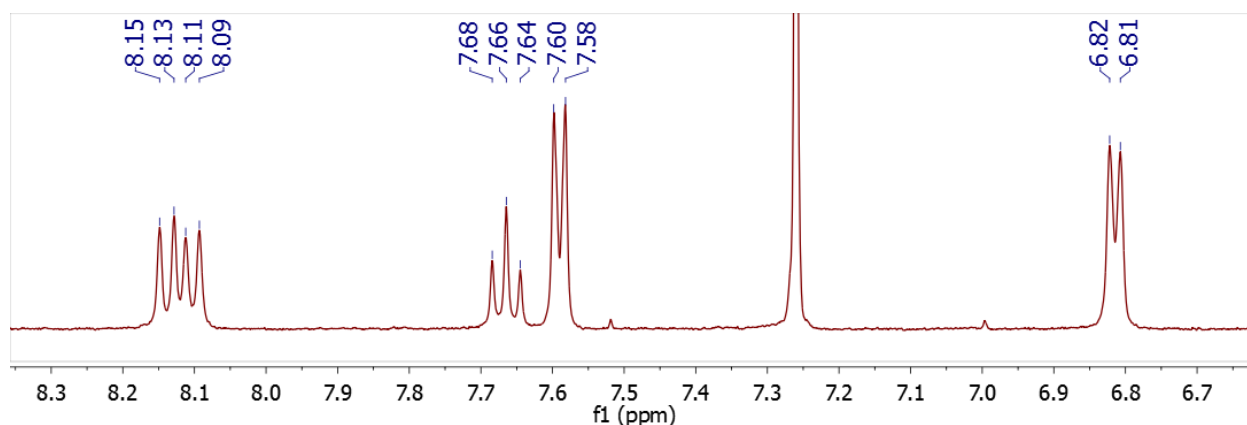

**Figure S1.**  $^1\text{H}$  NMR for  $[\text{Ru}(\text{bda})(\text{pic})_2]$  in  $\text{CDCl}_3$ .

**$[\text{Ru}(\text{bda})(\text{isoq})_2] \cdot 0.5\text{H}_2\text{O}$ .**  $[(\text{Ru}(\text{benzene})\text{Cl})_2\text{Cl}_2]$ , 307 mg (0.614 mmol),  $\text{bdaH}_2$ , 300 mg (1.23 mmol) and methanol (30 mL) were added to a three-neck round bottom flask. The mixture was degassed with argon and refluxed for 3 hours. Isoquinoline (2.0 mL) was added followed by triethylamine (1.5 mL) and refluxed was continued overnight. The reaction mixture was allowed to cool to room temperature and filtered to separate an orange solid, presumably *trans*- $[\text{Ru}(\text{isoq})_4\text{Cl}_2]$  based on  $^1\text{H}$  NMR. The filtrate was taken to dryness by rotary evaporation and acetone was added. The solid was collected by filtration and washed with acetone until the washings were clear. The solid was dissolved in chloroform and washed with aqueous ascorbic acid (two times) and with water. The organic phase was dried with magnesium sulfate, filtered and taken to dryness by rotary evaporation. The solid was collected to yield 630 mg, 85% of  $[\text{Ru}(\text{bda})(\text{isoq})_2]$ . Elemental analysis calculated for  $[\text{Ru}(\text{bda})(\text{isoq})_2] \cdot 0.5\text{H}_2\text{O}$ ,  $\text{C}_{30}\text{H}_{21}\text{N}_4\text{O}_{4.5}\text{Ru}$  (MW 610.59): C 59.01; H 3.47; N 9.18; Found: C 59.20, H 3.58, N 9.21.

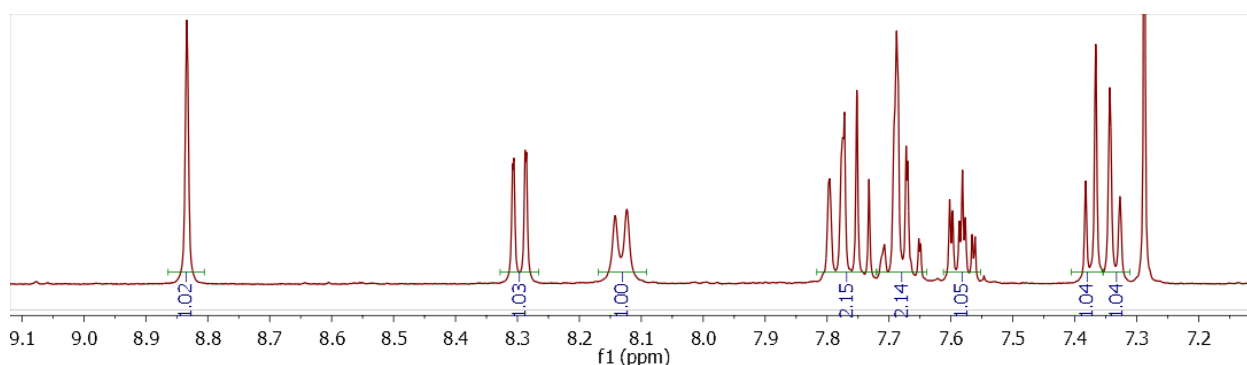

**Figure S2.**  $^1\text{H}$  NMR for  $[\text{Ru}(\text{bda})(\text{isoq})_2]$  in  $\text{CDCl}_3$ .

**$[\text{Ru}(\text{bda})(\text{pic})_2](\text{ClO}_4) \cdot 3\text{H}_2\text{O}$ .**  $[\text{Ru}(\text{bda})(\text{pic})_2]$  (50 mg, 0.094 mmol) was dissolved in 0.1 M  $\text{HClO}_4$  solution containing 20%  $\text{CH}_3\text{CN}$ . Controlled potential electrolysis past the  $\text{Ru}^{\text{III}}/\text{Ru}^{\text{II}}$  couple (0.75 V vs  $\text{Ag}/\text{AgCl}$ ) was carried out until  $\sim 1$  eq of charge was passed in a bulk electrolysis cell (Bioanalytical Systems Inc., **MF-1056**). Aqueous sodium perchlorate was

added and the CH<sub>3</sub>CN was removed by rotary evaporation. After cooling the yellow precipitate was collected by filtration, washed with water and air dried. **Caution!** Perchlorate salts are potentially explosive! Do not rinse the solid with organic solvents! Yield: 52 mg, 76%. Elemental analysis calculated for [Ru(bda)(pic)<sub>2</sub>](PF<sub>6</sub>)•3H<sub>2</sub>O, C<sub>24</sub>H<sub>26</sub>F<sub>6</sub>N<sub>4</sub>O<sub>7</sub>PRu (MW 728.53): C 39.57; H 3.60; N 7.69; Found: C 39.55, H 3.13, N 7.25. Single crystals for X-ray analysis were grown by slow diffusion of diethyl ether into a solution of the complex in CH<sub>3</sub>CN.

**[Ru(bda)(isq)<sub>2</sub>](ClO<sub>4</sub>)•3H<sub>2</sub>O.** [Ru(bda)(pic)<sub>2</sub>] (50 mg, 0.094 mmol) was dissolved in 0.1 M HClO<sub>4</sub> solution containing 20% CH<sub>3</sub>CN. Controlled potential electrolysis past the Ru<sup>III</sup>/Ru<sup>II</sup> couple (0.8 V vs Ag/AgCl) was carried out until ~ 1 eq of charge was passed in a bulk electrolysis cell (Bioanalytical Systems Inc., **MF-1056**). Aqueous sodium perchlorate was added and the CH<sub>3</sub>CN was removed by rotary evaporation. After cooling the yellow precipitate was collected by filtration, washed with water and air dried. **Caution!** Perchlorate salts are potentially explosive! Do not rinse the solid with organic solvents! Yield: 52 mg, 76%. Elemental analysis calculated for [Ru(bda)(isq)<sub>2</sub>](ClO<sub>4</sub>)•3H<sub>2</sub>O, C<sub>24</sub>H<sub>26</sub>F<sub>6</sub>N<sub>4</sub>O<sub>7</sub>PRu (MW 728.53): C 39.57; H 3.60; N 7.69; Found: C 39.55, H 3.13, N 7.25. Single crystals for X-ray analysis were grown by slow diffusion of diethyl ether into a solution of the complex in CH<sub>3</sub>CN.

**(1-(pyridin-4-yl)ethane-1,2-diyl)bis(phosphonic acid), P<sub>2</sub>-py.** The synthesis of this ligand was carried out in three steps starting from 4-vinylpyridinium triflate, Figure S3.

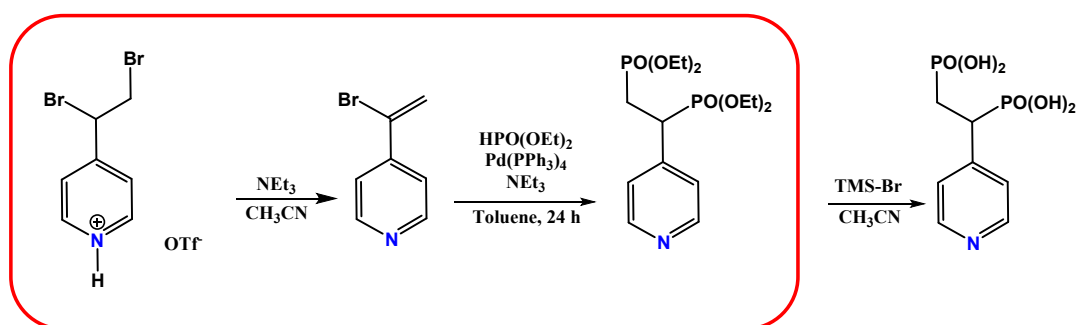

**Figure S3.** Synthetic scheme for the synthesis of **P<sub>2</sub>-py**.

**4-vinylpyridinium triflate.** 4-vinylpyridine (5.0 g, 47.6 mmol) was dissolved in diethyl ether and cooled in an ice bath. Excess triflic acid was added drop wise under magnetic stirring and the resulting white precipitate was filtered, rinsed with diethyl ether and air dried. Yield: 11.2 g, 92%.

**4-(1',2'-dibromoethyl)pyridinium triflate.** This compound was prepared by a modification of a reported procedure.<sup>4</sup> 4-vinylpyridinium triflate (8.0 g, 31.3 mmol) in chloroform (30 mL) was cooled in an ice bath and bromine (10.0 g, 62.6 mmol) was added drop wise with under magnetic stirring. After the addition was finished, the reaction mixture was stirred at ice bath temperature for an hour followed by another hour at room temperature. Excess diethyl ether

was added and the orange precipitate was filtered and rinsed with diethyl ether. Yield: 10.6 g, 82%.

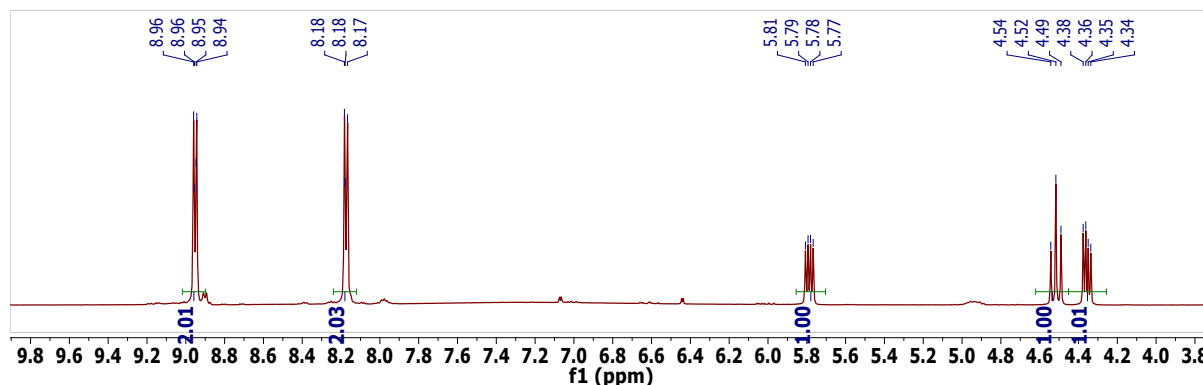

**Figure S4.** <sup>1</sup>H NMR for 4-(1',2'-dibromoethyl)pyridinium triflate in DMSO-d<sub>6</sub>.

*4-(1'-bromoethenyl)pyridine.* 4-(1',2'-dibromoethyl)pyridinium triflate (8.0 g, 19.3 mmol) was dissolved in anhydrous acetonitrile and cooled in an ice bath. Triethylamine (9.8 g, 96.5 mmol) was added slowly via syringe. The reaction mixture was stirred at ice bath temperature for an hour and at room temperature for 2 hours. All volatiles were removed by rotary evaporation and water was added to the residue. The aqueous solution was extracted with diethyl ether (5x30 mL), dried over magnesium sulfate and filtered. The diethyl ether was removed by rotary evaporation to yield light yellow oil. This compound was used in the next step without additional purification. Yield: 3.0 g, 85%.

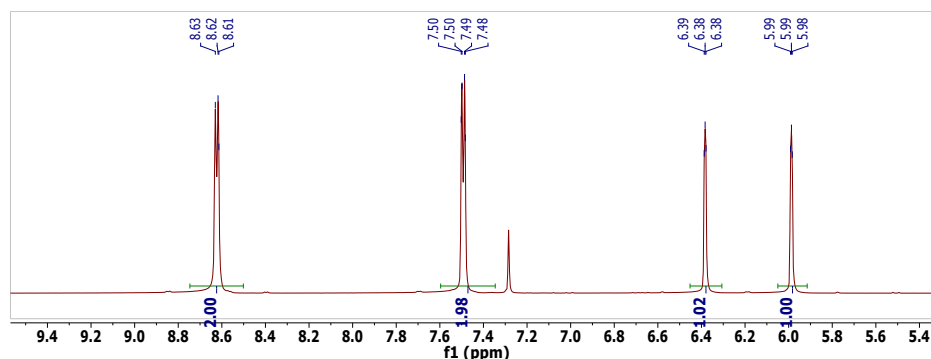

**Figure S5.** <sup>1</sup>H NMR for 4-(1'-bromoethenyl)pyridine in CDCl<sub>3</sub>.

*Tetraethyl (1-(pyridin-4-yl)ethane-1,2-diyl)bis(phosphonate).* 4-(1'-bromoethenyl)pyridine (2.5 g, 13.6 mmol) and Pd(PPh<sub>3</sub>)<sub>4</sub> (1.62 g, 1.4 mmol) were dissolved in anhydrous toluene (30 mL) using Schlenk techniques. Previously degassed diethylphosphite (40.8 mmol) and triethylamine (54.4 mmol) were added via syringe and the mixture was degassed by bubbling argon. The mixture was heated at 100 °C for 24 hours, cooled and filtered. All volatiles in the filtrate were removed by rotary evaporation and the oily residue was loaded on a silica gel column and eluted with CH<sub>2</sub>Cl<sub>2</sub>:NEt<sub>3</sub>:MeOH (90:7:3). The desired product was obtained as a clear oil. Yield: 3.35 g, 65%.

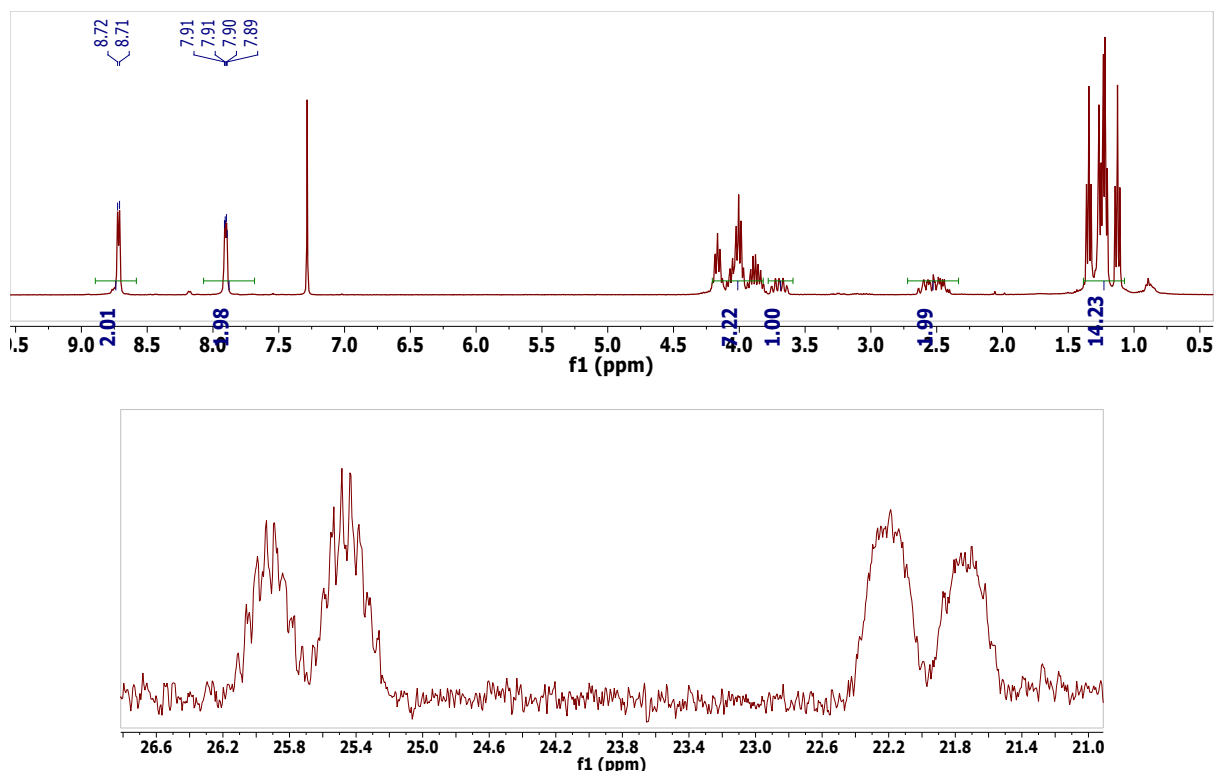

**Figure S6.**  $^1\text{H}$  NMR and  $^{31}\text{P}$  NMR for tetraethyl(1-(pyridin-4-yl)ethane-1',2'-diyl)bis(phosphonate) in  $\text{CDCl}_3$ .

(1-(pyridin-4-yl)ethane-1,2-diyl)bis(phosphonic acid), ***P*<sub>2</sub>-py**. Tetraethyl(1-(pyridin-4-yl)ethane-1',2'-diyl)bis(phosphonate) (3.0 g, 7.9 mmol) was dissolved in anhydrous acetonitrile (30 mL) using Schlenk techniques. Bromotrimethylsilane (5.44 g, 35.6 mmol) was added with a syringe and the mixture heated at 70 °C for 48 h. Anhydrous methanol (3.0 mL) was added and the mixture was allowed to cool to room temperature under magnetic stirring. The white solid was filtered and rinsed with acetonitrile. Yield: 1.96 g, 93%.  $^1\text{H}$  NMR (400 MHz,  $\text{D}_2\text{O}$ -NaOD):  $\delta$  8.31 (d, 2H), 7.42 (d, 2H), 3.34-3.03 (m, 1H), 2.18-1.99 (m, 2H).

**[Ru(bda)(*P*<sub>2</sub>-py)<sub>2</sub>].** [(Ru(benzene)Cl)<sub>2</sub>Cl<sub>2</sub>], 307 mg (0.614 mmol), bdaH<sub>2</sub>, 300 mg (1.23 mmol) and methanol (30 mL) were added to a three-neck round bottom flask. The mixture was degassed with argon and refluxed for 2 hours. *P*<sub>2</sub>-py (1.31 g, 4.92 mmol) was added followed by triethylamine (1.5 mL) and refluxed was continued for 48 h. The reaction mixture was allowed to cool to room temperature and filtered to separate an orange solid, presumably *trans*-[Ru(pic)<sub>4</sub>Cl<sub>2</sub>] based on  $^1\text{H}$  NMR. The filtrate was taken to dryness by rotary evaporation and acetone was added. The solid was collected by filtration and washed with acetone until the washings were clear. The solid was suspended in degassed acetone and refluxed under argon for an hour. The mixture was filtered hot and the solid washed with acetone and diethyl ether. Yield 733 mg, 68%.  $^1\text{H}$  NMR (400 MHz,  $\text{D}_2\text{O}$ -NaOD):  $\delta$  8.50 (d, 2H), 7.96-7.89 (m, 4H), 7.70 (d, 4H), 7.13 (d, 4H), 3.15-3.11 (m, 2H), 2.38-2.06 (m, 4H).

**Theoretical calculations.** Theoretical calculations were carried out using Density Functional Theory (DFT) as implemented in Gaussian09, revision D.01.<sup>5</sup> Becke's three-parameter

hybrid functional<sup>6-9</sup> with the LYP correlation functional<sup>10</sup> (B3LYP) was used. The LANL2 relativistic effective core potential<sup>11</sup> and associated uncontracted basis set was used for Ru and the 6-311G(5d,p) basis set for C, N, O, and H. The solvent (water) was modeled by means of the Integral Equation Formalism Polarizable Continuum Model (IEF-PCM)<sup>12-15</sup>, as implemented in Gaussian09. Universal Force Field radii (UFF) were used in all cases. Frequency calculations were performed to ensure that each optimized structure is a local minimum on the potential energy surface and to extract Gibbs free energies. For non-gases, the latter were corrected by adding  $\Delta G^{0 \rightarrow *}=RT \ln(24.46)=1.894$  kcal/mol to convert from the quantum chemical standard state of 1.0 atm of pressure in the gas phase to 1.0 M in solution.<sup>16,17</sup> For added water molecules,  $\Delta G^*_{\text{self}}=-3.947$  kcal/mol and  $\Delta G^{0 \rightarrow *}=+1.894$  kcal/mol were added to the gas phase Gibbs free energy to convert from the quantum chemical standard state of 1.0 atm of pressure in the gas phase to the vapor pressure of the pure liquid solvent.<sup>16,17</sup> Franck-Condon vertical excitation energies and oscillator strengths were obtained with non-equilibrium Time-Dependent Density Functional Theory (TD-DFT)<sup>18-20</sup> as implemented in Gaussian09.

Table S1. Selected bond distances (Å) for  $[\text{Ru}^{\text{II}}(\text{bda})(\text{pic})_2]$  and  $[\text{Ru}^{\text{III}}(\text{bda})(\text{pic})_2]^+$ .

| Complex              | $[\text{Ru}^{\text{II}}(\text{bda})(\text{pic})_2]$ | $[\text{Ru}^{\text{III}}(\text{bda})(\text{pic})_2]^+$ |
|----------------------|-----------------------------------------------------|--------------------------------------------------------|
| Ru–O1                | 2.216(7)                                            | 2.050(2)                                               |
| Ru–O2                | 2.172(7)                                            | 2.063(2)                                               |
| Ru–N1 <sub>bpy</sub> | 1.950(8)                                            | 1.994(2)                                               |
| Ru–N2 <sub>bpy</sub> | 1.914(7)                                            | 1.995(2)                                               |
| Ru–N1 <sub>pic</sub> | 2.070(6)                                            | 2.081(2)                                               |
| Ru–N2 <sub>pic</sub> | 2.084(6)                                            | 2.072(2)                                               |

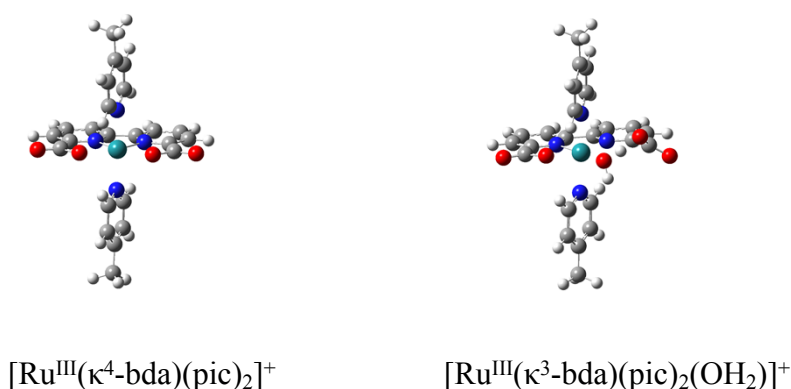

**Figure S7.** Optimized structures of  $[\text{Ru}^{\text{III}}(\kappa^4\text{-bda})(\text{pic})_2]^+$  and  $[\text{Ru}^{\text{III}}(\kappa^3\text{-bda})(\text{pic})_2(\text{OH}_2)]^+$ .



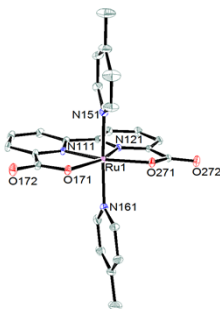

**Figure S8.** X-ray structure of  $[\text{Ru}^{\text{III}}(\text{bda})(\text{pic})_2]^+$  in the salt  $[\text{Ru}(\text{bda})(\text{pic})_2](\text{ClO}_4)$ . Oxidation from  $\text{Ru}^{\text{II}}$  to  $\text{Ru}^{\text{III}}$  results in significant shortening of the Ru–O distances ( $\Delta d = -0.14 \text{ \AA}$ ) and elongation of the Ru–N(bpy) distances ( $\Delta d = +0.06 \text{ \AA}$ ). But the Ru–N(pic) distances remain unaffected; most of the geometrical changes take place in the equatorial plane. The O–Ru–O bite angle increases from  $123.0$  to  $126.4^\circ$ .

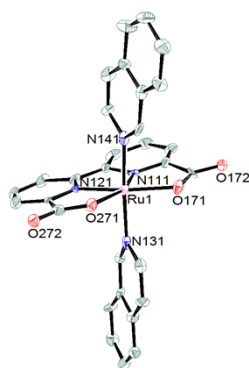

**Figure S9.** X-ray structure of  $[\text{Ru}^{\text{III}}(\text{bda})(\text{isq})_2]^+$  in the salt  $[\text{Ru}(\text{bda})(\text{isq})_2](\text{ClO}_4)$ .

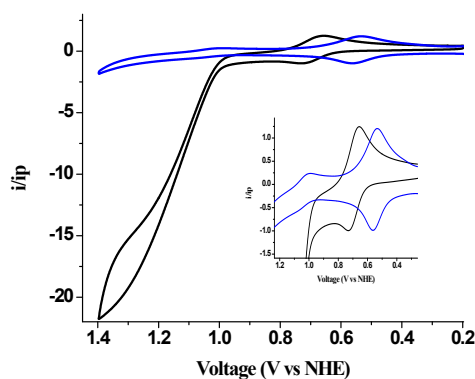

**Figure S10.** Cyclic voltammograms for  $1.0 \text{ mM } [\text{Ru}(\text{bda})(\text{pic})_2]$  (black trace) in solution with a glassy carbon electrode and  $[\text{Ru}(\text{bda})(\text{P}_2\text{-py})_2]$  (blue trace) on an FTO electrode in  $0.1 \text{ M pH } 8.0$  phosphate buffer. The currents have been normalized for  $v^{1/2}$  and  $v$ , respectively, and then for the  $\text{Ru}^{\text{IV/III}}$  peak current. The inset is an expansion of the  $\text{Ru}^{\text{IV/III}}$  couple.

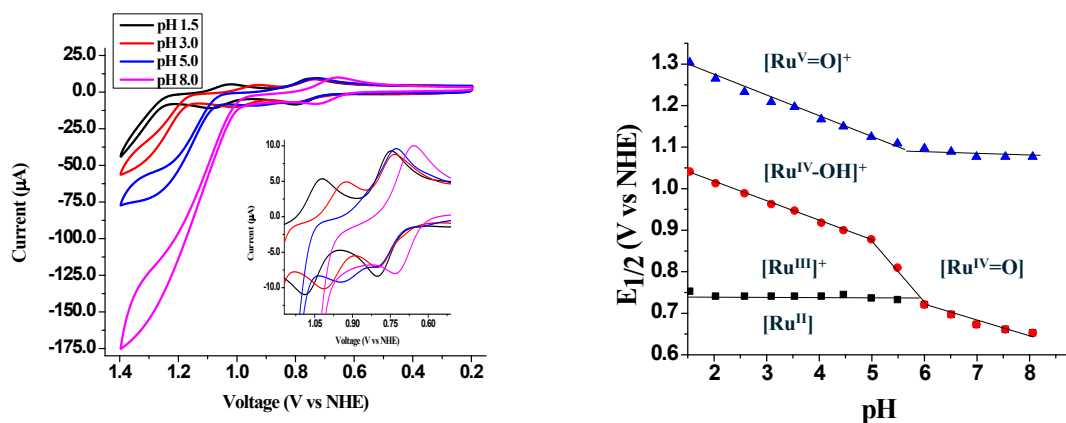

**Figure S11.** Representatives CVs at various pHs and  $E_{1/2}$  vs pH plot for  $[\text{Ru}(\text{bda})(\text{pic})_2]$ .

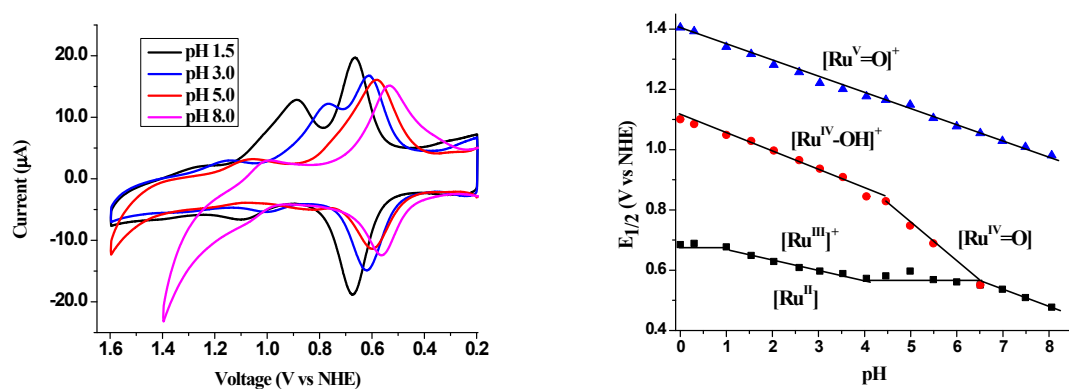

**Figure S12.** Representatives CVs at various pHs and  $E_{1/2}$  vs pH plot for  $[\text{Ru}(\text{bda})(\text{P}_2\text{-py})_2]$ .

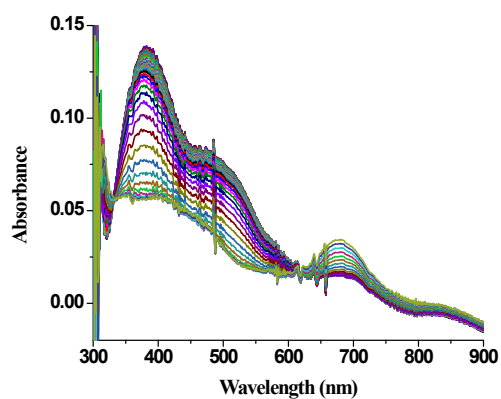

**Figure S13.** Spectral changes associated with oxidation of  $\text{Ru}^{\text{II}}$  to  $\text{Ru}^{\text{III}}$  in Figure 3.

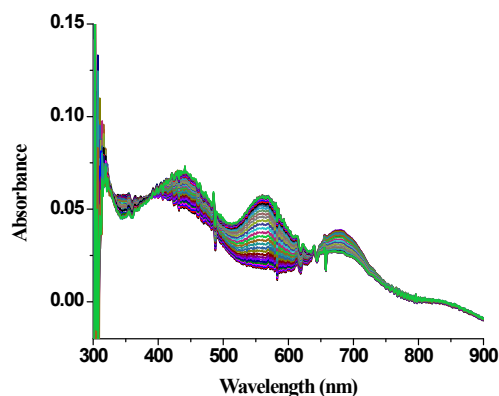

**Figure S14.** Spectral changes associated with oxidation of  $\text{Ru}^{\text{III}}$  to “ $\text{Ru}^{\text{IV}}$ ” in Figure 3.

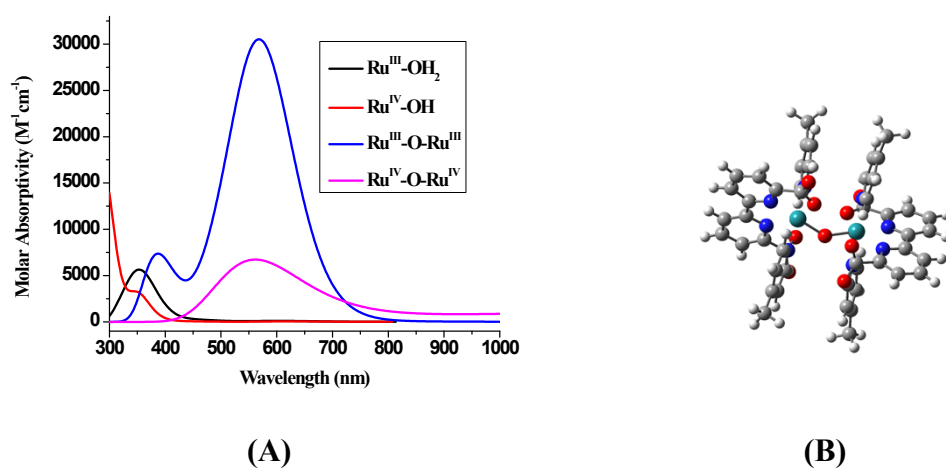

**Figure S15.** (A) Predicted absorption spectra using TD-DFT for  $[\text{Ru}^{\text{III}}(\kappa^3\text{-bda})(\text{pic})_2(\text{OH}_2)]^+$  ( $\text{Ru}^{\text{III}}\text{-OH}_2$ ),  $[\text{Ru}^{\text{IV}}(\text{bda})(\text{pic})_2(\text{OH})]^+$  ( $\text{Ru}^{\text{IV}}\text{-OH}$ ),  $[(\kappa^3\text{-bda})(\text{pic})_2\text{Ru}^{\text{III}}\text{ORu}^{\text{III}}(\kappa^3\text{-bda})(\text{pic})_2]$  ( $\text{Ru}^{\text{III}}\text{-O-Ru}^{\text{III}}$ ) and  $[(\kappa^3\text{-bda})(\text{pic})_2\text{Ru}^{\text{IV}}\text{ORu}^{\text{IV}}(\kappa^3\text{-bda})(\text{pic})_2]$  ( $\text{Ru}^{\text{IV}}\text{-O-Ru}^{\text{IV}}$ ). (B) Optimized structure of  $[(\kappa^3\text{-bda})(\text{pic})_2\text{Ru}^{\text{III}}\text{ORu}^{\text{III}}(\kappa^3\text{-bda})(\text{pic})_2]$  ( $\text{Ru}^{\text{III}}\text{-O-Ru}^{\text{III}}$ ).

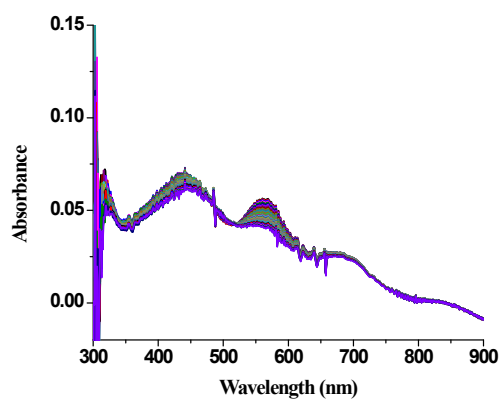

**Figure S16.** Spectral changes associated with the last oxidation process in Figure 3.

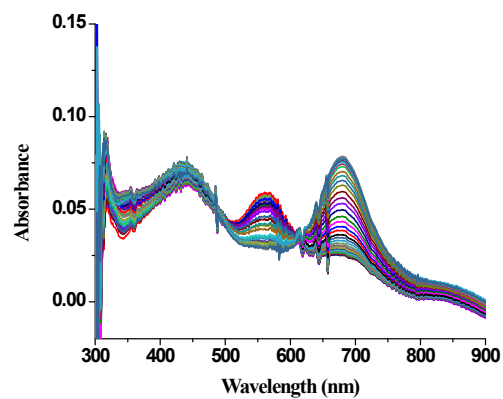

**Figure S17.** Spectral changes associated with the reduction process from 172 to 216 s in Figure 3.

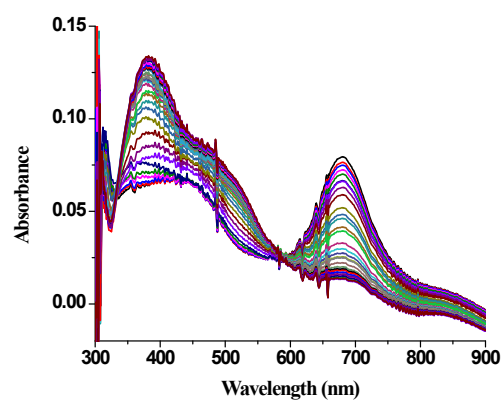

**Figure S18.** Spectral changes associated with the reduction process from 217 to 280 s in Figure 3.

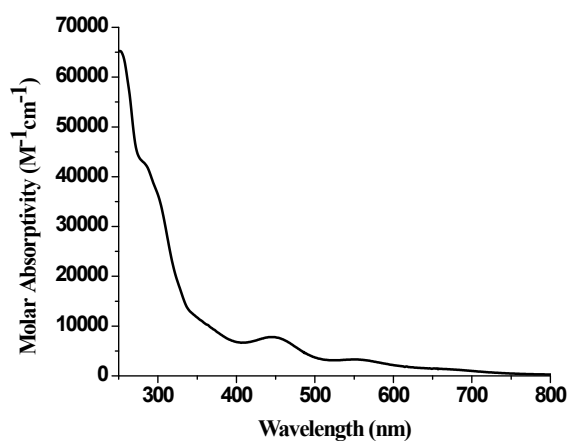

**Figure S19.** Absorption spectra for “Ru<sup>IV</sup>ORu<sup>IV</sup>” at pH 1.0. It was generated electrochemically from [Ru(bda)(pic)<sub>2</sub>] by controlled-potential electrolysis at 1.2 V.

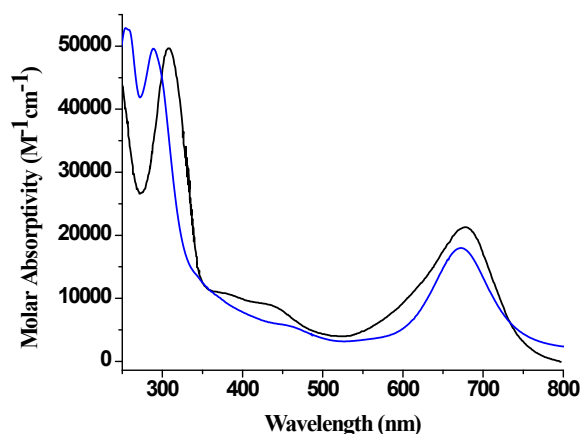

**Figure S20.** Absorption spectra for “Ru<sup>III</sup>ORu<sup>III</sup>” at pH 1.0. Blue: electrochemically generated “Ru<sup>III</sup>ORu<sup>III</sup>” from [Ru(bda)(pic)<sub>2</sub>] by controlled-potential electrolysis at 1.2 V followed by reduction of the generated intermediate at 0.97 V. Black: [(L)<sub>2</sub>(H<sub>2</sub>O)Ru<sup>III</sup>ORu<sup>III</sup>(OH<sub>2</sub>)(L)<sub>2</sub>]<sup>4+</sup> (L is 2,2'-bipyridine-4,4'-dicarboxylic acid) according to Graetzel *et al.*, *J. Mol. Catal.* **1989**, 52, 63.

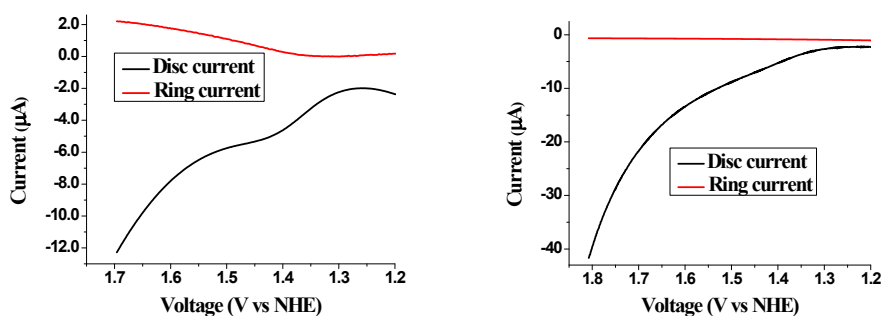

**Figure S21.** (A) Rotating ring disc voltammogram in 0.1 M HClO<sub>4</sub>. The potential at the disc was scanned from 1.2 V to 1.7 V at 10 mV/s. The rotation rate was 500 rpm. The potential of the ring (platinum) was held constant at -0.017 V. Black: current with [Ru(bda)(P<sub>2</sub>-py)<sub>2</sub>] attached to *nano*-ITO-modified glassy carbon disc. Red: corresponding ring current with [Ru(bda)(P<sub>2</sub>-py)<sub>2</sub>] present on the modified disc electrode. The increase in cathodic current at the ring past 1.33 V indicates oxygen generation at the disc. The collection efficiency at the ring for this experiment is 12.5%.<sup>4</sup> This number accounts for the overall ring collection efficiency of 25% and the factor of 2 ratio between water oxidation to O<sub>2</sub> at the disc (4e<sup>-</sup>) and O<sub>2</sub> reduction to H<sub>2</sub>O<sub>2</sub> (2e<sup>-</sup>) at the ring. (B) Rotating ring disc voltammogram in 0.1 M HClO<sub>4</sub>. The potential at the disc was scanned from 1.2 V to 1.8 V at 10 mV/s. The rotation rate was 500 rpm. The potential of the ring (platinum) was held constant at +1.13 V where oxidation of H<sub>2</sub>O<sub>2</sub> to O<sub>2</sub> at platinum is diffusion-limited. Black: current with [Ru(bda)(P<sub>2</sub>-py)<sub>2</sub>] attached to *nano*-ITO-modified glassy carbon disc. Red: corresponding ring current with [Ru(bda)(P<sub>2</sub>-py)<sub>2</sub>] present on the modified disc electrode. The absence of anodic current at the ring indicates that no H<sub>2</sub>O<sub>2</sub> is generated at the disc. The collection efficiency at the ring for this experiment is 25 %.<sup>4</sup> This number accounts for the overall ring collection efficiency of 25% and the factor of 1 ratio between water oxidation to H<sub>2</sub>O<sub>2</sub> at the disc (2e<sup>-</sup>) and H<sub>2</sub>O<sub>2</sub> oxidation to O<sub>2</sub> (2e<sup>-</sup>) at the ring.

**Collection and Reduction of X-Ray Data.** Crystals of [Ru(bda)(pic)<sub>2</sub>](ClO<sub>4</sub>) and [Ru(bda)(isq)<sub>2</sub>](ClO<sub>4</sub>), were mounted on the end of a glass fibers. Data was collected with a Bruker Kappa Apex II diffractometer. Data collected at 173K indicated monoclinic symmetry and space group *P2<sub>1</sub>* for [Ru(bda)(pic)<sub>2</sub>](ClO<sub>4</sub>) and orthorhombic symmetry and space group *P2<sub>1</sub>2<sub>1</sub>2<sub>1</sub>* for [Ru(bda)(isq)<sub>2</sub>](ClO<sub>4</sub>). Crystal data and information about the data collection are provided in Table S2 and below.

**Determination and Refinement of the Structure.** The structure was solved<sup>22</sup> by Patterson heavy atom methods. In the least-squares refinement,<sup>22</sup> anisotropic temperature parameters were used for all the non-hydrogen atoms. Hydrogen atoms were placed at calculated positions and allowed to "ride" on the atom to which they were attached. The isotropic thermal parameters for the hydrogen atoms were determined from the atom to which they are attached. The data were corrected for absorption using the multi-scan method (SADABS).<sup>23</sup> Table 1 contains details of the data collection and refinement.

**Structures.** An ORTEP drawing of [Ru(bda)(pic)<sub>2</sub>](ClO<sub>4</sub>) showing the number scheme used is presented in Figure S19. In [Ru(bda)(pic)<sub>2</sub>](ClO<sub>4</sub>) there are two close contacts between H(162) and H(156) of the two picoline ligands to O172 (1-x, ½+y, 2-z) of a symmetry related complex. The dihedral angle between the two picoline ligands is 5.5°. There are also two C-H...O hydrogen bonds between H162 and 156 of the two picoline ligands and O172 (1-x, ½ + y, 2-z) of a symmetry related complex with H...O172 (1-x, ½ + y, 2-z) distances of 2.57 and 2.56 Å respectively. The Ru(1)...O172 (1-x, ½ + y, 2-z) distance is 3.794(2) Å. In the seven coordinate Ru(IV) complex previously reported the picoline distances in the hydrogen bonds to the coordinated water are H...O(3) 2.63 and 2.71 Å while the angle between picolines ligands is 80.4 degrees. In [Ru<sup>II</sup>(bda)(pic)<sub>2</sub>] the H...O(2) distances between the picoline and a coordinated oxygen atom are 2.38 and 2.64 Å and the picoline twist angle 22.4 degrees.

An ORTEP drawing of [Ru(bda)(isq)<sub>2</sub>](ClO<sub>4</sub>) showing the number scheme used is presented in Figure S20. The dihedral angle between the two isoquinoline ligands is 10.0°. In this complex the distance between the hydrogen of the isoquinoline and the coordinated oxygen atoms are 3.15 and 2.84 and 2.75 and 3.083 Å to O(171) and O(172), respectively.

**Table S2.** Crystallographic Collection and Refinement Data for [Ru(bda)(pic)<sub>2</sub>](ClO<sub>4</sub>) and [Ru(bda)(isq)<sub>2</sub>](ClO<sub>4</sub>).

|                | [Ru(bda)(pic) <sub>2</sub> ](ClO <sub>4</sub> )                    | [Ru(bda)(isq) <sub>2</sub> ](ClO <sub>4</sub> )                    |
|----------------|--------------------------------------------------------------------|--------------------------------------------------------------------|
| Formula        | C <sub>24</sub> H <sub>20</sub> O <sub>8</sub> N <sub>4</sub> ClRu | C <sub>30</sub> H <sub>20</sub> O <sub>8</sub> N <sub>4</sub> ClRu |
| fw             | 628.96                                                             | 701.02                                                             |
| temp           | 173(2) K                                                           | 173(2) K                                                           |
| cryst. syst    | Monoclinic                                                         | Orthorhombic                                                       |
| space group    | <i>P2<sub>1</sub></i>                                              | <i>P2<sub>1</sub>2<sub>1</sub>2<sub>1</sub></i>                    |
| <i>a</i> (Å)   | 10.0833(2)                                                         | 7.6696(18)                                                         |
| <i>b</i> (Å)   | 9.8576(2)                                                          | 11.321(2)                                                          |
| <i>c</i> (Å)   | 12.7262(3)                                                         | 32.206(7)                                                          |
| <i>α</i> (deg) | 90                                                                 | 90                                                                 |
| <i>β</i> (deg) | 95.3270(10)                                                        | 90                                                                 |

|                                                     |                                    |                                    |
|-----------------------------------------------------|------------------------------------|------------------------------------|
| $\gamma$ (deg)                                      | 90                                 | 90                                 |
| $V$ (Å <sup>3</sup> )                               | 1259.48(5)                         | 2796.3(11)                         |
| $Z$                                                 | 2                                  | 4                                  |
| $\mu$                                               | 0.785 mm <sup>-1</sup>             | 0.717 mm <sup>-1</sup>             |
| $\lambda$ (Å)                                       | 0.71073                            | 0.71073                            |
| $\rho$ calc (g cm <sup>-3</sup> )                   | 1.658                              | 1.665                              |
| cryst. size (mm)                                    | 0.43 × 0.20 × 0.04                 | 0.40 × 0.07 × 0.07                 |
| $\theta$ range (deg)                                | 2.47 to 30.18                      | 2.20 to 25.00                      |
| total no. of reflns                                 | 20199                              | 32740                              |
| no. of independent reflns,<br>$I \geq 3.0\sigma(I)$ | 7318 [R(int) = 0.0337]<br>6424     | 4903 [R(int) = 0.2023]<br>3181     |
| no. of parameters                                   | 343                                | 415                                |
| Final R indices [ $I > 3\sigma(I)$ ]                | R1 = 0.0310,<br>wR2 = 0.0614       | R1 = 0.0745,<br>wR2 = 0.1497       |
| R indices (all data)                                | R1 = 0.0419,<br>wR2 = 0.0649       | R1 = 0.1378,<br>wR2 = 0.1693       |
| Goodness-of-fit on F <sup>2</sup>                   | 0.993                              | 0.974                              |
| Absorption correction                               | Semi-empirical from<br>equivalents | Semi-empirical from<br>equivalents |

$$R1 = \sum ||F_o| - |F_c|| / \sum |F_o|; \quad wR2 = \{ \sum [w(|F_o|^2 - |F_c|^2)^2] / \sum [w|F_o|^2] \}^{1/2}$$

**Table S3.** Comparison of bond lengths [Å] and angles [deg] between [Ru(bda)(pic)<sub>2</sub>](ClO<sub>4</sub>) and [Ru(bda)(isq)<sub>2</sub>](ClO<sub>4</sub>).

|                     | [Ru(bda)(pic) <sub>2</sub> ](ClO <sub>4</sub> ) | [Ru(bda)(isq) <sub>2</sub> ](ClO <sub>4</sub> ) |
|---------------------|-------------------------------------------------|-------------------------------------------------|
| Ru(1)–N(111)        | 1.9945(19)                                      | 1.974(7)                                        |
| Ru(1)–N(121)        | 1.995(2)                                        | 1.964(8)                                        |
| Ru(1)–O(171)        | 2.0496(17)                                      | 2.046(7)                                        |
| Ru(1)–O(271)        | 2.0626(18)                                      | 2.047(7)                                        |
| Ru(1)–N(131)        | 2.072(3)                                        | 2.062(8)                                        |
| Ru(1)–N(141)        | 2.0807(19)                                      | 2.093(9)                                        |
| N(111)–Ru(1)–N(121) | 77.59(8)                                        | 79.0(4)                                         |
| N(111)–Ru(1)–O(171) | 78.08(7)                                        | 78.0(3)                                         |
| N(121)–Ru(1)–O(171) | 155.59(7)                                       | 156.6(3)                                        |
| N(111)–Ru(1)–O(271) | 155.52(9)                                       | 155.8(3)                                        |
| N(121)–Ru(1)–O(271) | 77.96(7)                                        | 77.2(3)                                         |
| O(171)–Ru(1)–O(271) | 126.39(7)                                       | 126.0(3)                                        |
| N(111)–Ru(1)–N(141) | 90.78(12)                                       | 89.2(3)                                         |

|                     |            |          |
|---------------------|------------|----------|
| N(121)–Ru(1)–N(141) | 93.87(8)   | 96.2(3)  |
| O(171)–Ru(1)–N(141) | 88.45(8)   | 87.7(3)  |
| O(271)–Ru(1)–N(141) | 89.86(11)  | 89.3(3)  |
| N(111)–Ru(1)–N(131) | 95.66(8)   | 97.3(3)  |
| N(121)–Ru(1)–N(131) | 92.85(8)   | 97.4(3)  |
| O(171)–Ru(1)–N(131) | 87.54(8)   | 90.0(3)  |
| O(271)–Ru(1)–N(131) | 86.54(8)   | 86.3(3)  |
| N(141)–Ru(1)–N(131) | 171.56(10) | 172.4(3) |

For this table [Ru(bda)(pic)<sub>2</sub>](ClO<sub>4</sub>) has been renumbered so N151 is N141 and N161 is N131.

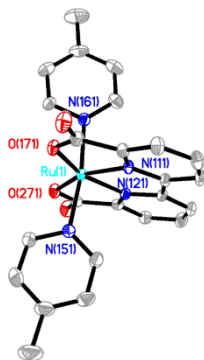

**Figure S22.** A view of [Ru(bda)(pic)<sub>2</sub>](ClO<sub>4</sub>).

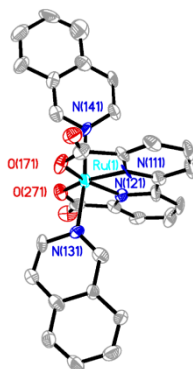

**Figure S23.** A view of [Ru(bda)(isq)<sub>2</sub>](ClO<sub>4</sub>).



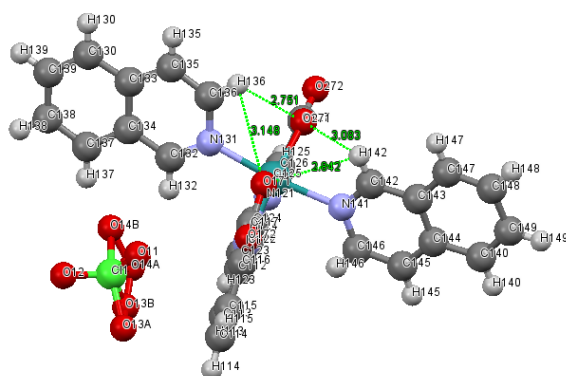

**Figure S24.** Close contacts for [Ru(bda)(isq)<sub>2</sub>](ClO<sub>4</sub>).

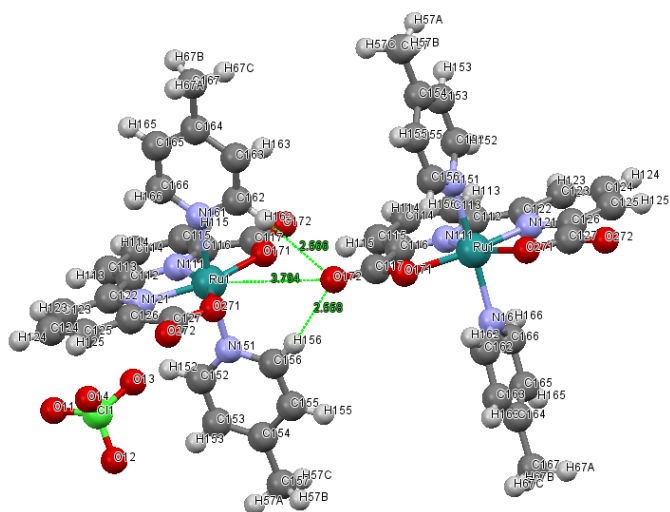

**Figure S25.** Close contacts for [Ru(bda)(pic)<sub>2</sub>](ClO<sub>4</sub>).

**Table S4.** Cartesian coordinates for [(κ<sup>3</sup>-bda)(pic)<sub>2</sub>Ru<sup>III</sup>ORu<sup>III</sup>(κ<sup>3</sup>-bda)(pic)<sub>2</sub>] (Ru<sup>III</sup>–O–Ru<sup>III</sup>).

| Center Number | Atomic Number | Coordinates (Å) |           |           |
|---------------|---------------|-----------------|-----------|-----------|
|               |               | x               | y         | z         |
| 1             | 44            | −1.816693       | −0.062663 | −0.139402 |
| 2             | 7             | −3.730731       | −0.701964 | −0.600783 |

|    |    |           |           |           |
|----|----|-----------|-----------|-----------|
| 3  | 6  | -6.208939 | -1.701128 | -1.252002 |
| 4  | 6  | -4.759913 | -0.470526 | 0.23502   |
| 5  | 6  | -3.889879 | -1.396311 | -1.742791 |
| 6  | 6  | -5.125549 | -1.913074 | -2.108516 |
| 7  | 6  | -6.029414 | -0.978735 | -0.07375  |
| 8  | 1  | -5.216973 | -2.465368 | -3.036336 |
| 9  | 1  | -6.868263 | -0.81795  | 0.591819  |
| 10 | 1  | -7.189339 | -2.09522  | -1.498254 |
| 11 | 7  | -3.078935 | 0.652604  | 1.57945   |
| 12 | 6  | -5.033816 | 1.582072  | 3.380448  |
| 13 | 6  | -2.738372 | 1.421055  | 2.637052  |
| 14 | 6  | -4.409941 | 0.337396  | 1.416317  |
| 15 | 6  | -5.391069 | 0.777441  | 2.299236  |
| 16 | 6  | -3.700013 | 1.909838  | 3.539076  |
| 17 | 1  | -6.427911 | 0.511517  | 2.138135  |
| 18 | 1  | -3.368405 | 2.536235  | 4.360133  |
| 19 | 1  | -5.788146 | 1.942013  | 4.072716  |
| 20 | 6  | -2.618686 | -1.55179  | -2.544476 |
| 21 | 6  | -1.286862 | 1.777837  | 2.956065  |
| 22 | 8  | -0.666221 | 0.897096  | 3.598024  |
| 23 | 8  | -0.928049 | 2.931524  | 2.621258  |
| 24 | 8  | -1.566082 | -1.026397 | -1.980626 |
| 25 | 8  | -2.6239   | -2.140402 | -3.625095 |
| 26 | 7  | -2.282906 | 1.827989  | -1.07711  |
| 27 | 6  | -3.008508 | 4.328373  | -2.172376 |
| 28 | 6  | -2.883363 | 1.918377  | -2.281161 |
| 29 | 6  | -2.027046 | 2.977427  | -0.417449 |
| 30 | 6  | -2.378133 | 4.222372  | -0.927388 |
| 31 | 6  | -3.256653 | 3.128198  | -2.850187 |
| 32 | 1  | -3.066541 | 0.991034  | -2.806758 |
| 33 | 1  | -2.154626 | 5.109197  | -0.341862 |
| 34 | 1  | -3.739784 | 3.126486  | -3.82239  |
| 35 | 7  | -1.510926 | -1.936446 | 0.898869  |
| 36 | 6  | -1.47011  | -4.360195 | 2.354359  |
| 37 | 6  | -1.335247 | -1.942992 | 2.238358  |
| 38 | 6  | -1.634485 | -3.130648 | 0.281105  |
| 39 | 6  | -1.623161 | -4.339666 | 0.961489  |
| 40 | 6  | -1.311212 | -3.119621 | 2.980181  |
| 41 | 1  | -1.193355 | -0.981258 | 2.721176  |
| 42 | 1  | -1.725693 | -3.109358 | -0.795474 |
| 43 | 1  | -1.728402 | -5.261606 | 0.397938  |
| 44 | 1  | -1.165132 | -3.056361 | 4.054257  |
| 45 | 8  | 0.000049  | 0.560175  | -0.00001  |
| 46 | 1  | -1.539595 | 2.893349  | 0.548728  |
| 47 | 44 | 1.816772  | -0.062656 | 0.139296  |
| 48 | 7  | 3.730821  | -0.702042 | 0.600614  |
| 49 | 6  | 6.209035  | -1.701301 | 1.2517    |
| 50 | 6  | 4.760013  | -0.470486 | -0.235143 |
| 51 | 6  | 3.889976  | -1.396525 | 1.742537  |
| 52 | 6  | 5.125641  | -1.913357 | 2.108183  |

|     |   |           |           |           |
|-----|---|-----------|-----------|-----------|
| 53  | 6 | 6.029516  | -0.97873  | 0.073558  |
| 54  | 1 | 5.217062  | -2.465772 | 3.035932  |
| 55  | 1 | 6.868369  | -0.817813 | -0.591975 |
| 56  | 1 | 7.189433  | -2.095428 | 1.497902  |
| 57  | 7 | 3.079027  | 0.652816  | -1.579378 |
| 58  | 6 | 5.033909  | 1.582973  | -3.380014 |
| 59  | 6 | 2.738441  | 1.42154   | -2.636772 |
| 60  | 6 | 4.41005   | 0.337658  | -1.416286 |
| 61  | 6 | 5.391171  | 0.777994  | -2.299061 |
| 62  | 6 | 3.700096  | 1.910729  | -3.538568 |
| 63  | 1 | 6.428016  | 0.512035  | -2.138035 |
| 64  | 1 | 3.368475  | 2.53739   | -4.359418 |
| 65  | 1 | 5.788243  | 1.943176  | -4.072142 |
| 66  | 6 | 2.618818  | -1.551981 | 2.544259  |
| 67  | 6 | 1.28689   | 1.778035  | -2.955945 |
| 68  | 8 | 0.92779   | 2.931661  | -2.621265 |
| 69  | 8 | 0.666544  | 0.897097  | -3.597922 |
| 70  | 8 | 1.566233  | -1.026419 | 1.980512  |
| 71  | 8 | 2.624019  | -2.140669 | 3.624833  |
| 72  | 7 | 2.28292   | 1.827932  | 1.07713   |
| 73  | 6 | 3.008083  | 4.328307  | 2.172691  |
| 74  | 6 | 2.883415  | 1.918273  | 2.281166  |
| 75  | 6 | 2.02685   | 2.977401  | 0.417607  |
| 76  | 6 | 2.377729  | 4.222347  | 0.927691  |
| 77  | 6 | 3.256476  | 3.128091  | 2.850345  |
| 78  | 1 | 3.066814  | 0.990887  | 2.806615  |
| 79  | 1 | 2.154065  | 5.109205  | 0.342275  |
| 80  | 1 | 3.739626  | 3.126348  | 3.822538  |
| 81  | 7 | 1.510905  | -1.936393 | -0.89901  |
| 82  | 6 | 1.470114  | -4.360185 | -2.354435 |
| 83  | 6 | 1.633823  | -3.130605 | -0.281137 |
| 84  | 6 | 1.335796  | -1.942953 | -2.238575 |
| 85  | 6 | 1.311798  | -3.119594 | -2.980372 |
| 86  | 6 | 1.622495  | -4.339642 | -0.961492 |
| 87  | 1 | 1.724471  | -3.109281 | 0.795487  |
| 88  | 1 | 1.16621   | -3.056333 | -4.054515 |
| 89  | 1 | 1.727199  | -5.261591 | -0.397855 |
| 90  | 1 | 1.539398  | 2.893355  | -0.54857  |
| 91  | 6 | -3.376647 | 5.662704  | -2.765279 |
| 92  | 1 | -4.23831  | 5.578286  | -3.434229 |
| 93  | 1 | -2.540413 | 6.060944  | -3.354451 |
| 94  | 1 | -3.606176 | 6.395566  | -1.9859   |
| 95  | 6 | -1.486568 | -5.650336 | 3.130825  |
| 96  | 1 | -0.937218 | -6.43719  | 2.60356   |
| 97  | 1 | -2.516888 | -6.0056   | 3.260477  |
| 98  | 1 | -1.049966 | -5.524026 | 4.125576  |
| 99  | 6 | 3.375964  | 5.662625  | 2.765785  |
| 100 | 1 | 2.539819  | 6.060392  | 3.355403  |
| 101 | 1 | 3.604914  | 6.395775  | 1.986509  |
| 102 | 1 | 4.237922  | 5.578351  | 3.434375  |

|     |   |          |           |           |
|-----|---|----------|-----------|-----------|
| 103 | 6 | 1.486624 | −5.650356 | −3.130848 |
| 104 | 1 | 2.516907 | −6.005963 | −3.259857 |
| 105 | 1 | 1.050664 | −5.523941 | −4.125867 |
| 106 | 1 | 0.936697 | −6.437013 | −2.603889 |
| 107 | 1 | 1.19424  | −0.981203 | −2.721458 |

**Table S5.** Cartesian coordinates for  $[\text{Ru}^{\text{III}}(\kappa^3\text{-bda})(\text{pic})_2(\text{OH}_2)]^+$  ( $\text{Ru}^{\text{III}}\text{-OH}_2$ ).

| Center Number | Atomic Number | Coordinates (Å) |           |           |
|---------------|---------------|-----------------|-----------|-----------|
|               |               | x               | y         | z         |
| 1             | 1             | −0.389348       | −0.158951 | 4.536759  |
| 2             | 6             | −0.366807       | −0.778495 | 3.651874  |
| 3             | 6             | −0.29371        | −2.344326 | 1.394158  |
| 4             | 6             | −0.201071       | −0.207991 | 2.386756  |
| 5             | 6             | −0.500554       | −2.157982 | 3.76227   |
| 6             | 6             | −0.461855       | −2.960656 | 2.621211  |
| 7             | 7             | −0.176953       | −1.009896 | 1.308664  |
| 8             | 1             | −0.629215       | −2.607254 | 4.738429  |
| 9             | 1             | −0.552565       | −4.037227 | 2.667473  |
| 10            | 7             | 0.130704        | 1.531268  | 0.745578  |
| 11            | 6             | 0.108841        | 3.533681  | 2.689396  |
| 12            | 6             | −0.035248       | 1.221517  | 2.074143  |
| 13            | 6             | 0.270054        | 2.826315  | 0.387385  |
| 14            | 6             | 0.23945         | 3.842273  | 1.347625  |
| 15            | 6             | −0.033228       | 2.20088   | 3.057231  |
| 16            | 1             | 0.3209          | 4.862616  | 1.002246  |
| 17            | 1             | −0.14672        | 1.927995  | 4.096354  |
| 18            | 1             | 0.107486        | 4.312352  | 3.441384  |
| 19            | 6             | 0.458982        | 3.270218  | −1.079068 |
| 20            | 8             | −0.075863       | 4.338126  | −1.374479 |
| 21            | 6             | −0.20393        | −3.050508 | 0.059488  |
| 22            | 8             | −0.317279       | −4.253437 | −0.041289 |
| 23            | 8             | 0.029248        | −2.229159 | −0.945001 |
| 24            | 44            | −0.00235        | −0.222994 | −0.546328 |
| 25            | 7             | −2.141037       | −0.197287 | −0.722841 |
| 26            | 6             | −4.92915        | −0.213681 | −1.099339 |
| 27            | 6             | −2.719149       | −1.03221  | −1.611826 |
| 28            | 6             | −2.943785       | 0.625716  | −0.017813 |
| 29            | 6             | −4.317661       | 0.641962  | −0.177443 |
| 30            | 6             | −4.086956       | −1.064534 | −1.821071 |
| 31            | 1             | −2.0563         | −1.69502  | −2.151709 |
| 32            | 1             | −2.468096       | 1.288482  | 0.689677  |
| 33            | 1             | −4.905456       | 1.325091  | 0.422825  |
| 34            | 1             | −4.489045       | −1.760038 | −2.546868 |
| 35            | 7             | 2.134213        | −0.372024 | −0.58217  |
| 36            | 6             | 4.92233         | −0.6592   | −0.80705  |

|    |   |           |           |           |
|----|---|-----------|-----------|-----------|
| 37 | 6 | 2.683539  | -1.020514 | -1.628489 |
| 38 | 6 | 2.961199  | 0.128394  | 0.354471  |
| 39 | 6 | 4.337619  | 0.005735  | 0.274494  |
| 40 | 6 | 4.051372  | -1.175452 | -1.770978 |
| 41 | 1 | 1.996459  | -1.413726 | -2.3631   |
| 42 | 1 | 2.508752  | 0.645424  | 1.187344  |
| 43 | 1 | 4.947202  | 0.434912  | 1.059866  |
| 44 | 1 | 4.430693  | -1.700688 | -2.638714 |
| 45 | 6 | 6.410258  | -0.833459 | -0.9158   |
| 46 | 1 | 6.942655  | -0.032832 | -0.400607 |
| 47 | 1 | 6.730225  | -0.859664 | -1.958616 |
| 48 | 1 | 6.709383  | -1.780869 | -0.455236 |
| 49 | 6 | -6.415043 | -0.20046  | -1.315088 |
| 50 | 1 | -6.68945  | 0.637736  | -1.963865 |
| 51 | 1 | -6.948113 | -0.069888 | -0.371458 |
| 52 | 1 | -6.756748 | -1.119233 | -1.792445 |
| 53 | 8 | 1.187793  | 2.53108   | -1.813962 |
| 54 | 8 | 0.198672  | 0.421459  | -2.556324 |
| 55 | 1 | 0.640492  | 1.349623  | -2.407232 |
| 56 | 1 | -0.621834 | 0.550575  | -3.049476 |

**Table S6.** Cartesian coordinates for  $[\text{Ru}^{\text{IV}}(\text{bda})(\text{pic})_2(\text{OH})]^+$  ( $\text{Ru}^{\text{IV}}\text{-OH}$ ).

| Center Number | Atomic Number | Coordinates (Å) |           |           |
|---------------|---------------|-----------------|-----------|-----------|
|               |               | x               | y         | z         |
| 1             | 44            | -0.00313        | -0.013848 | -0.653645 |
| 2             | 7             | -0.326927       | 1.236397  | 1.100793  |
| 3             | 6             | -0.883649       | 2.849043  | 3.281499  |
| 4             | 6             | -0.207313       | 0.739907  | 2.351615  |
| 5             | 6             | -0.663611       | 2.520507  | 0.927654  |
| 6             | 6             | -0.962163       | 3.358615  | 1.990335  |
| 7             | 6             | -0.484831       | 1.530374  | 3.464769  |
| 8             | 1             | -1.230679       | 4.385278  | 1.781662  |
| 9             | 1             | -0.388682       | 1.118661  | 4.459336  |
| 10            | 1             | -1.110852       | 3.471965  | 4.136721  |
| 11            | 7             | 0.343215        | -1.186355 | 1.138164  |
| 12            | 6             | 0.935856        | -2.717573 | 3.368932  |
| 13            | 6             | 0.685259        | -2.475524 | 1.007717  |
| 14            | 6             | 0.237253        | -0.645591 | 2.372552  |
| 15            | 6             | 0.531771        | -1.395553 | 3.509285  |
| 16            | 6             | 1.002123        | -3.272471 | 2.095933  |
| 17            | 1             | 0.444904        | -0.949151 | 4.489672  |
| 18            | 1             | 1.273054        | -4.304747 | 1.920563  |
| 19            | 1             | 1.176313        | -3.308446 | 4.243047  |
| 20            | 6             | -0.590661       | 2.959284  | -0.50014  |
| 21            | 6             | 0.583646        | -2.973841 | -0.397951 |

|    |   |           |           |           |
|----|---|-----------|-----------|-----------|
| 22 | 8 | 0.130341  | -2.054382 | -1.201569 |
| 23 | 8 | 0.847003  | -4.117667 | -0.715854 |
| 24 | 8 | -0.176499 | 2.002155  | -1.278248 |
| 25 | 8 | -0.851765 | 4.093567  | -0.855567 |
| 26 | 7 | 2.122969  | 0.230909  | -0.761645 |
| 27 | 6 | 4.899378  | 0.544335  | -1.04147  |
| 28 | 6 | 2.804482  | 1.088269  | 0.020837  |
| 29 | 6 | 2.805907  | -0.465878 | -1.68955  |
| 30 | 6 | 4.17549   | -0.335656 | -1.850157 |
| 31 | 6 | 4.171869  | 1.268105  | -0.091088 |
| 32 | 1 | 2.236713  | 1.646149  | 0.7514    |
| 33 | 1 | 4.669934  | -0.92188  | -2.614756 |
| 34 | 1 | 4.662004  | 1.976932  | 0.564579  |
| 35 | 7 | -2.132815 | -0.254153 | -0.744457 |
| 36 | 6 | -4.916362 | -0.564195 | -0.975311 |
| 37 | 6 | -2.793068 | -1.161465 | 0.00046   |
| 38 | 6 | -2.844929 | 0.497717  | -1.607523 |
| 39 | 6 | -4.216939 | 0.369746  | -1.744119 |
| 40 | 6 | -4.162599 | -1.337196 | -0.085837 |
| 41 | 1 | -2.205439 | -1.757227 | 0.683424  |
| 42 | 1 | -2.284379 | 1.21267   | -2.193151 |
| 43 | 1 | -4.732454 | 1.005903  | -2.452631 |
| 44 | 1 | -4.635333 | -2.07936  | 0.545172  |
| 45 | 1 | 2.219103  | -1.120972 | -2.316271 |
| 46 | 6 | 6.38865   | 0.692136  | -1.170081 |
| 47 | 1 | 6.729262  | 0.425675  | -2.171373 |
| 48 | 1 | 6.891792  | 0.028042  | -0.4595   |
| 49 | 1 | 6.70581   | 1.712094  | -0.946534 |
| 50 | 6 | -6.400386 | -0.748994 | -1.11317  |
| 51 | 1 | -6.881035 | 0.1564    | -1.485659 |
| 52 | 1 | -6.854165 | -1.026866 | -0.160477 |
| 53 | 1 | -6.610294 | -1.554456 | -1.824695 |
| 54 | 8 | 0.065095  | -0.053462 | -2.593915 |
| 55 | 1 | -0.667396 | -0.601216 | -2.910064 |

**Table S7.** Cartesian coordinates for  $[(\kappa^3\text{-bda})(\text{pic})_2\text{Ru}^{\text{IV}}\text{ORu}^{\text{IV}}(\kappa^3\text{-bda})(\text{pic})_2]$  ( $\text{Ru}^{\text{IV}}\text{-O-Ru}^{\text{IV}}$ ).

| Center Number | Atomic Number | Coordinates<br>(Å) |           |           |
|---------------|---------------|--------------------|-----------|-----------|
|               |               | x                  | y         | z         |
| 1             | 44            | -1.796897          | -0.0706   | -0.033232 |
| 2             | 7             | -3.761545          | -0.708002 | -0.355394 |
| 3             | 6             | -6.313811          | -1.592935 | -0.846182 |
| 4             | 6             | -4.744817          | -0.340878 | 0.489691  |
| 5             | 6             | -4.002548          | -1.486264 | -1.422209 |
| 6             | 6             | -5.27484           | -1.953915 | -1.709291 |
| 7             | 6             | -6.051971          | -0.78409  | 0.257445  |

|    |    |           |           |           |
|----|----|-----------|-----------|-----------|
| 8  | 1  | -5.430195 | -2.579113 | -2.580437 |
| 9  | 1  | -6.854129 | -0.501258 | 0.927258  |
| 10 | 1  | -7.324184 | -1.940055 | -1.031812 |
| 11 | 7  | -2.947107 | 0.804899  | 1.583398  |
| 12 | 6  | -4.610296 | 1.842133  | 3.562237  |
| 13 | 6  | -2.432308 | 1.592336  | 2.544638  |
| 14 | 6  | -4.291273 | 0.517134  | 1.584352  |
| 15 | 6  | -5.136166 | 1.020376  | 2.561073  |
| 16 | 6  | -3.257914 | 2.128422  | 3.549222  |
| 17 | 1  | -6.191678 | 0.780431  | 2.544713  |
| 18 | 1  | -2.808345 | 2.765438  | 4.302397  |
| 19 | 1  | -5.258068 | 2.247298  | 4.332122  |
| 20 | 6  | -2.771122 | -1.772856 | -2.228857 |
| 21 | 6  | -0.93553  | 1.938201  | 2.597147  |
| 22 | 8  | -0.237195 | 1.097818  | 3.20537   |
| 23 | 8  | -0.638358 | 3.031022  | 2.070433  |
| 24 | 8  | -1.689609 | -1.198546 | -1.721422 |
| 25 | 8  | -2.768877 | -2.455417 | -3.23509  |
| 26 | 7  | -2.276206 | 1.671828  | -1.209621 |
| 27 | 6  | -3.129092 | 3.9379    | -2.649832 |
| 28 | 6  | -2.686948 | 1.568002  | -2.491502 |
| 29 | 6  | -2.239879 | 2.901971  | -0.651927 |
| 30 | 6  | -2.658608 | 4.034433  | -1.335773 |
| 31 | 6  | -3.124275 | 2.65971   | -3.223246 |
| 32 | 1  | -2.651138 | 0.590346  | -2.944069 |
| 33 | 1  | -2.611314 | 4.993391  | -0.82981  |
| 34 | 1  | -3.454846 | 2.504638  | -4.245136 |
| 35 | 7  | -1.538523 | -1.852039 | 1.178483  |
| 36 | 6  | -1.380369 | -4.144797 | 2.812398  |
| 37 | 6  | -1.295448 | -1.743347 | 2.503977  |
| 38 | 6  | -1.668166 | -3.092286 | 0.656359  |
| 39 | 6  | -1.595392 | -4.239241 | 1.430564  |
| 40 | 6  | -1.216141 | -2.855074 | 3.331453  |
| 41 | 1  | -1.109326 | -0.748244 | 2.894494  |
| 42 | 1  | -1.812249 | -3.166879 | -0.410761 |
| 43 | 1  | -1.70611  | -5.203805 | 0.946158  |
| 44 | 1  | -1.013757 | -2.702518 | 4.386582  |
| 45 | 8  | -0.000011 | 0.254518  | -0.000014 |
| 46 | 1  | -1.842026 | 2.987363  | 0.353841  |
| 47 | 44 | 1.796875  | -0.070605 | 0.03324   |
| 48 | 7  | 3.76152   | -0.707983 | 0.355454  |
| 49 | 6  | 6.313792  | -1.592842 | 0.846345  |
| 50 | 6  | 4.744799  | -0.340907 | -0.489644 |
| 51 | 6  | 4.002517  | -1.48617  | 1.422326  |
| 52 | 6  | 5.274813  | -1.953778 | 1.709463  |
| 53 | 6  | 6.051956  | -0.784084 | -0.257345 |
| 54 | 1  | 5.430164  | -2.578913 | 2.580654  |
| 55 | 1  | 6.854118  | -0.501291 | -0.92717  |
| 56 | 1  | 7.324167  | -1.939934 | 1.032016  |
| 57 | 7  | 2.947101  | 0.804796  | -1.583448 |

|     |   |           |           |           |
|-----|---|-----------|-----------|-----------|
| 58  | 6 | 4.610304  | 1.84188   | -3.562351 |
| 59  | 6 | 2.432313  | 1.592186  | -2.544732 |
| 60  | 6 | 4.291265  | 0.517023  | -1.584373 |
| 61  | 6 | 5.136164  | 1.020187  | -2.561129 |
| 62  | 6 | 3.257928  | 2.128195  | -3.549351 |
| 63  | 1 | 6.191674  | 0.780234  | -2.544748 |
| 64  | 1 | 2.80837   | 2.765174  | -4.302563 |
| 65  | 1 | 5.258082  | 2.246982  | -4.332265 |
| 66  | 6 | 2.771076  | -1.772751 | 2.228958  |
| 67  | 6 | 0.93555   | 1.938128  | -2.597221 |
| 68  | 8 | 0.638474  | 3.031011  | -2.070581 |
| 69  | 8 | 0.237139  | 1.097754  | -3.205366 |
| 70  | 8 | 1.689553  | -1.198531 | 1.721442  |
| 71  | 8 | 2.768826  | -2.455244 | 3.235238  |
| 72  | 7 | 2.276187  | 1.671864  | 1.20958   |
| 73  | 6 | 3.129144  | 3.937949  | 2.649731  |
| 74  | 6 | 2.686813  | 1.568078  | 2.491501  |
| 75  | 6 | 2.240002  | 2.901981  | 0.651816  |
| 76  | 6 | 2.658767  | 4.034448  | 1.33563   |
| 77  | 6 | 3.124177  | 2.659793  | 3.223215  |
| 78  | 1 | 2.650868  | 0.590455  | 2.944126  |
| 79  | 1 | 2.611588  | 4.993381  | 0.829608  |
| 80  | 1 | 3.454652  | 2.504753  | 4.245141  |
| 81  | 7 | 1.538525  | -1.852071 | -1.178441 |
| 82  | 6 | 1.380398  | -4.144834 | -2.812348 |
| 83  | 6 | 1.668356  | -3.092306 | -0.656341 |
| 84  | 6 | 1.295289  | -1.743392 | -2.503907 |
| 85  | 6 | 1.215989  | -2.855123 | -3.331378 |
| 86  | 6 | 1.5956    | -4.239266 | -1.430542 |
| 87  | 1 | 1.812587  | -3.166891 | 0.41076   |
| 88  | 1 | 1.013465  | -2.702582 | -4.386483 |
| 89  | 1 | 1.706473  | -5.203821 | -0.946155 |
| 90  | 1 | 1.842229  | 2.987348  | -0.353984 |
| 91  | 6 | -3.579682 | 5.146777  | -3.422695 |
| 92  | 1 | -4.383696 | 4.895443  | -4.120789 |
| 93  | 1 | -2.745363 | 5.54637   | -4.013657 |
| 94  | 1 | -3.923363 | 5.942267  | -2.755753 |
| 95  | 6 | -1.339166 | -5.364301 | 3.690414  |
| 96  | 1 | -0.945921 | -6.230529 | 3.150604  |
| 97  | 1 | -2.353156 | -5.618005 | 4.025666  |
| 98  | 1 | -0.729834 | -5.192896 | 4.582113  |
| 99  | 6 | 3.579764  | 5.146837  | 3.422559  |
| 100 | 1 | 2.745347  | 5.546706  | 4.013195  |
| 101 | 1 | 3.923826  | 5.942155  | 2.755607  |
| 102 | 1 | 4.383505  | 4.89543   | 4.120939  |
| 103 | 6 | 1.339201  | -5.364335 | -3.690371 |
| 104 | 1 | 2.353159  | -5.61787  | -4.025847 |
| 105 | 1 | 0.729651  | -5.193012 | -4.581937 |
| 106 | 1 | 0.946209  | -6.230633 | -3.15049  |
| 107 | 1 | 1.109039  | -0.748301 | -2.894401 |



## References

1. Bennett, M. A.; Smith, A. K. *J. Chem. Soc. Dalton Trans.* **1974**, 233.
2. Donnici, Claudio Luis; Máximo Filho, Daniel Henrique; Cruz Moreira, Leda Lúcia; Teixeira dos Reis, Genuína; Santos Cordeiro, Estefania; Ferreira de Oliveira, Ione Ma.; Carvalho, Sandra; Paniago, Eucler B. *J. Braz. Chem. Soc.* **1998**, *9*, 455.
3. Gray, A. P.; Kraus, H.; Heitmeier, D. E.; Shiley, R. H. *J Org Chem* **1968**, *33*, 3007.
4. Concepcion, J. J.; Binstead, R. A.; Alibabaei, L.; Meyer, T. J., *Inorg. Chem.* **2013**, *52*, 10744.
5. Gaussian 09, Revision D.01. M. J. Frisch, G. W. Trucks, H. B. Schlegel, G. E. Scuseria, M. A. Robb, J. R. Cheeseman, G. Scalmani, V. Barone, B. Mennucci, G. A. Petersson, H. Nakatsuji, M. Caricato, X. Li, H. P. Hratchian, A. F. Izmaylov, J. Bloino, G. Zheng, J. L. Sonnenberg, M. Hada, M. Ehara, K. Toyota, R. Fukuda, J. Hasegawa, M. Ishida, T. Nakajima, Y. Honda, O. Kitao, H. Nakai, T. Vreven, J. A. Montgomery, Jr., J. E. Peralta, F. Ogliaro, M. Bearpark, J. J. Heyd, E. Brothers, K. N. Kudin, V. N. Staroverov, T. Keith, R. Kobayashi, J. Normand, K. Raghavachari, A. Rendell, J. C. Burant, S. S. Iyengar, J. Tomasi, M. Cossi, N. Rega, J. M. Millam, M. Klene, J. E. Knox, J. B. Cross, V. Bakken, C. Adamo, J. Jaramillo, R. Gomperts, R. E. Stratmann, O. Yazyev, A. J. Austin, R. Cammi, C. Pomelli, J. W. Ochterski, R. L. Martin, K. Morokuma, V. G. Zakrzewski, G. A. Voth, P. Salvador, J. J. Dannenberg, S. Dapprich, A. D. Daniels, O. Farkas, J. B. Foresman, J. V. Ortiz, J. Cioslowski, and D. J. Fox, Gaussian, Inc., Wallingford CT, 2013.
6. Becke, A. D. *Phys. Rev., Ser. A* **1988**, *38*, 3098-3100.
7. Becke, A. D. *J. Chem. Phys.* **1993**, *98*, 1372-1377.
8. Becke, A. D. *J. Chem. Phys.* **1993**, *98*, 5648-5652.
9. Stevens, P. J.; Devlin, F. J.; Chablowski, C. F.; Frisch, M. J. *J. Phys. Chem.* **1994**, *98*, 11623-11627.
10. Lee, C.; Yang, W.; Parr, R. G. *Phys. Rev.* **1988**, *B37*, 785-789.
11. Hay, P. J.; Wadt, W. R. *J. Chem. Phys.* **1985**, *82*, 299.
12. Tomasi, J.; Mennucci, B.; Cammi, R. *Chem. Rev.* **2005**, *105* (8), 2999-3093.
13. Cance`s, E.; Mennucci, B.; Tomasi, J. *J. Chem. Phys.* **1997**, *107*, 3032.
14. Mennucci, B.; Cance`s, E.; Tomasi, J. *J. Phys. Chem. B* **1997**, *101*, 10506.
15. Cance`s, E.; Mennucci, B. *J. Math. Chem.* **1998**, *23*, 309.
16. Polyansky, D. E.; Muckerman, J. T.; Rochford, J.; Zong, R.; Thummel, R. P.; Fujita, E. *J. Am. Chem. Soc.* **2011**, *133*, 14649.
17. Kelly, C. P.; Cramer, C. J.; Truhlar, D. G. *J. Phys. Chem. B* **2006**, *110*, 16066-16081.
18. Kelly, C. P.; Cramer, C. J.; Truhlar, D. G. *J. Phys. Chem. B* **2007**, *111*, 408-422.
19. Stratmann, R. E.; Scuseria, G. E.; Frisch, M. J. *J. Chem. Phys.* **1998**, *109*, 8218-8224.
20. Bauernschmitt, R.; Ahlrichs, R. *Chem. Phys. Lett.* **1996**, *256*, 454-464.
21. Casida, M. E.; Jamorski, C.; Casida, K. C.; Salahub, D. R. *J. Chem. Phys.* **1998**, *108*, 4439-4449.
22. Sheldrick, G. M.; Siemens Analytical Instruments, Inc.: Madison WI, 1994.

23. Sheldrick; Bruker AXS Inc.: 2007.
